# Supplementary material
Source: publisher figshare collection journal article supplement (https://springernature.figshare.com/ndownloader/files/21687618)
Supplement: Supplementary file 1 [file 21687618]

## Sheet: Sheet1
Table S2. Distribution of ACD11 genes across the tree of life
Accession number	Scientific name	Taxid	Pfam	Kingdom	Phylum	Class	Order	Family	Genus	Species
ELU15728.1	Capitella teleta	283909	GLTP	Animalia	Annelida	Polychaeta	Capitellida	Capitellidae	Capitella	Capitella teleta
ELU09811.1	Capitella teleta	283909	GLTP	Animalia	Annelida	Polychaeta	Capitellida	Capitellidae	Capitella	Capitella teleta
XP_015926727.1	Parasteatoda tepidariorum	114398	GLTP	Animalia	Arthropoda	Arachnida	Araneae	Theridiidae	Parasteatoda	Parasteatoda tepidariorum
XP_023708890.1	Cryptotermes secundus	105785	GLTP	Animalia	Arthropoda	Insecta	Blattodea	Kalotermitidae	Cryptotermes	Cryptotermes secundus
KDR11086.1	Zootermopsis nevadensis	136037	GLTP	Animalia	Arthropoda	Insecta	Blattodea	Termopsidae	Zootermopsis	Zootermopsis nevadensis
XP_017773861.1	Nicrophorus vespilloides	110193	GLTP	Animalia	Arthropoda	Insecta	Coleoptera	Silphidae	Nicrophorus	Nicrophorus vespilloides
KZS14098.1	Daphnia magna	35525	GLTP	Animalia	Arthropoda	Branchiopoda	Diplostraca	Daphniidae	Daphnia	Daphnia magna
EFX74206.1	Daphnia pulex	6669	GLTP	Animalia	Arthropoda	Branchiopoda	Diplostraca	Daphniidae	Daphnia	Daphnia pulex
XP_316032.4	Anopheles gambiae str. PEST	180454	GLTP	Animalia	Arthropoda	Insecta	Diptera	Culicidae	Anopheles	Anopheles gambiae
KFB43849.1	Anopheles sinensis	74873	GLTP	Animalia	Arthropoda	Insecta	Diptera	Culicidae	Anopheles	Anopheles sinensis
ETN59424.1	Anopheles darlingi	43151	GLTP	Animalia	Arthropoda	Insecta	Diptera	Culicidae	Anopheles	Anopheles darlingi
XP_013108639.1	Stomoxys calcitrans	35570	GLTP	Animalia	Arthropoda	Insecta	Diptera	Muscidae	Stomoxys	Stomoxys calcitrans
XP_005183769.1	Musca domestica	7370	GLTP	Animalia	Arthropoda	Insecta	Diptera	Muscidae	Musca	Musca domestica
XP_018795821.1	Bactrocera latifrons	174628	GLTP	Animalia	Arthropoda	Insecta	Diptera	Tephritidae	Bactrocera	Bactrocera latifrons
XP_017472488.1	Rhagoletis zephyria	28612	GLTP	Animalia	Arthropoda	Insecta	Diptera	Tephritidae	Rhagoletis	Rhagoletis zephyria
XP_014086725.1	Bactrocera oleae	104688	GLTP	Animalia	Arthropoda	Insecta	Diptera	Tephritidae	Bactrocera	Bactrocera oleae
XP_011209686.1	Bactrocera dorsalis	27457	GLTP	Animalia	Arthropoda	Insecta	Diptera	Tephritidae	Bactrocera	Bactrocera dorsalis
XP_004534941.1	Ceratitis capitata	7213	GLTP	Animalia	Arthropoda	Insecta	Diptera	Tephritidae	Ceratitis	Ceratitis capitata
XP_022184176.1	Nilaparvata lugens	108931	GLTP	Animalia	Arthropoda	Insecta	Hemiptera	Delphacidae	Nilaparvata	Nilaparvata lugens
RZF47246.1	Laodelphax striatella	195883	GLTP	Animalia	Arthropoda	Insecta	Hemiptera	Delphacidae	Laodelphax	Laodelphax striatella
RZF37044.1	Laodelphax striatella	195883	GLTP	Animalia	Arthropoda	Insecta	Hemiptera	Delphacidae	Laodelphax	Laodelphax striatella
XP_014288200.1	Halyomorpha halys	286706	GLTP	Animalia	Arthropoda	Insecta	Hemiptera	Pentatomidae	Halyomorpha	Halyomorpha halys
XP_011495375.1	Ceratosolen solmsi marchali	326594	GLTP	Animalia	Arthropoda	Insecta	Hymenoptera	Agaonidae	Ceratosolen	Ceratosolen solmsi
XP_017875508.1	Ceratina calcarata	156304	GLTP	Animalia	Arthropoda	Insecta	Hymenoptera	Apidae	Ceratina	Ceratina calcarata
XP_017798631.1	Habropoda laboriosa	597456	GLTP	Animalia	Arthropoda	Insecta	Hymenoptera	Apidae	Habropoda	Habropoda laboriosa
XP_017759864.1	Eufriesea mexicana	516756	GLTP	Animalia	Arthropoda	Insecta	Hymenoptera	Apidae	Eufriesea	Eufriesea mexicana
XP_006564955.1	Apis mellifera	7460	GLTP	Animalia	Arthropoda	Insecta	Hymenoptera	Apidae	Apis	Apis mellifera
XP_003694813.1	Apis florea	7463	GLTP	Animalia	Arthropoda	Insecta	Hymenoptera	Apidae	Apis	Apis florea
KOX79570.1	Melipona quadrifasciata	166423	GLTP	Animalia	Arthropoda	Insecta	Hymenoptera	Apidae	Melipona	Melipona quadrifasciata
XP_015110948.1	Diachasma alloeum	454923	GLTP	Animalia	Arthropoda	Insecta	Hymenoptera	Braconidae	Diachasma	Diachasma alloeum
XP_011297443.1	Fopius arisanus	64838	GLTP	Animalia	Arthropoda	Insecta	Hymenoptera	Braconidae	Fopius	Fopius arisanus
XP_008550781.1	Microplitis demolitor	69319	GLTP	Animalia	Arthropoda	Insecta	Hymenoptera	Braconidae	Microplitis	Microplitis demolitor
XP_015597756.1	Cephus cinctus	211228	GLTP	Animalia	Arthropoda	Insecta	Hymenoptera	Cephidae	Cephus	Cephus cinctus
XP_015597755.1	Cephus cinctus	211228	GLTP	Animalia	Arthropoda	Insecta	Hymenoptera	Cephidae	Cephus	Cephus cinctus
XP_015597754.1	Cephus cinctus	211228	GLTP	Animalia	Arthropoda	Insecta	Hymenoptera	Cephidae	Cephus	Cephus cinctus
XP_015520105.1	Neodiprion lecontei	441921	GLTP	Animalia	Arthropoda	Insecta	Hymenoptera	Diprionidae	Neodiprion	Neodiprion lecontei
XP_015520104.1	Neodiprion lecontei	441921	GLTP	Animalia	Arthropoda	Insecta	Hymenoptera	Diprionidae	Neodiprion	Neodiprion lecontei
XP_014208407.1	Copidosoma floridanum	29053	GLTP	Animalia	Arthropoda	Insecta	Hymenoptera	Encyrtidae	Copidosoma	Copidosoma floridanum
XP_029168976.1	Nylanderia fulva	613905	GLTP	Animalia	Arthropoda	Insecta	Hymenoptera	Formicidae	Nylanderia	Nylanderia fulva
XP_024877610.1	Temnothorax curvispinosus	300111	GLTP	Animalia	Arthropoda	Insecta	Hymenoptera	Formicidae	Temnothorax	Temnothorax curvispinosus
XP_020284153.1	Pseudomyrmex gracilis	219809	GLTP	Animalia	Arthropoda	Insecta	Hymenoptera	Formicidae	Pseudomyrmex	Pseudomyrmex gracilis
XP_018398827.1	Cyphomyrmex costatus	456900	GLTP	Animalia	Arthropoda	Insecta	Hymenoptera	Formicidae	Cyphomyrmex	Cyphomyrmex costatus
XP_018369853.1	Trachymyrmex cornetzi	471704	GLTP	Animalia	Arthropoda	Insecta	Hymenoptera	Formicidae	Trachymyrmex	Trachymyrmex cornetzi
XP_018351531.1	Trachymyrmex septentrionalis	34720	GLTP	Animalia	Arthropoda	Insecta	Hymenoptera	Formicidae	Trachymyrmex	Trachymyrmex septentrionalis
XP_018303106.1	Trachymyrmex zeteki	64791	GLTP	Animalia	Arthropoda	Insecta	Hymenoptera	Formicidae	Trachymyrmex	Trachymyrmex zeteki
XP_018053205.1	Atta colombica	520822	GLTP	Animalia	Arthropoda	Insecta	Hymenoptera	Formicidae	Atta	Atta colombica
XP_018053204.1	Atta colombica	520822	GLTP	Animalia	Arthropoda	Insecta	Hymenoptera	Formicidae	Atta	Atta colombica
XP_014477509.1	Dinoponera quadriceps	609295	GLTP	Animalia	Arthropoda	Insecta	Hymenoptera	Formicidae	Dinoponera	Dinoponera quadriceps
XP_012522525.1	Monomorium pharaonis	307658	GLTP	Animalia	Arthropoda	Insecta	Hymenoptera	Formicidae	Monomorium	Monomorium pharaonis
XP_012218280.1	Linepithema humile	83485	GLTP	Animalia	Arthropoda	Insecta	Hymenoptera	Formicidae	Linepithema	Linepithema humile
XP_012060595.1	Atta cephalotes	12957	GLTP	Animalia	Arthropoda	Insecta	Hymenoptera	Formicidae	Atta	Atta cephalotes
XP_011876650.1	Vollenhovia emeryi	411798	GLTP	Animalia	Arthropoda	Insecta	Hymenoptera	Formicidae	Vollenhovia	Vollenhovia emeryi
XP_011696096.1	Wasmannia auropunctata	64793	GLTP	Animalia	Arthropoda	Insecta	Hymenoptera	Formicidae	Wasmannia	Wasmannia auropunctata
XP_011648158.1	Pogonomyrmex barbatus	144034	GLTP	Animalia	Arthropoda	Insecta	Hymenoptera	Formicidae	Pogonomyrmex	Pogonomyrmex barbatus
XP_011347034.1	Ooceraea biroi	2015173	GLTP	Animalia	Arthropoda	Insecta	Hymenoptera	Formicidae	Ooceraea	Ooceraea biroi
XP_011253155.1	Camponotus floridanus	104421	GLTP	Animalia	Arthropoda	Insecta	Hymenoptera	Formicidae	Camponotus	Camponotus floridanus
XP_011161159.1	Solenopsis invicta	13686	GLTP	Animalia	Arthropoda	Insecta	Hymenoptera	Formicidae	Solenopsis	Solenopsis invicta
XP_011148623.1	Harpegnathos saltator	610380	GLTP	Animalia	Arthropoda	Insecta	Hymenoptera	Formicidae	Harpegnathos	Harpegnathos saltator
TGZ48559.1	Temnothorax longispinosus	300112	GLTP	Animalia	Arthropoda	Insecta	Hymenoptera	Formicidae	Temnothorax	Temnothorax longispinosus
KMQ95512.1	Lasius niger	67767	GLTP	Animalia	Arthropoda	Insecta	Hymenoptera	Formicidae	Lasius	Lasius niger
XP_015439017.1	Dufourea novaeangliae	178035	GLTP	Animalia	Arthropoda	Insecta	Hymenoptera	Halictidae	Dufourea	Dufourea novaeangliae
XP_029039265.1	Osmia bicornis bicornis	1437191	GLTP	Animalia	Arthropoda	Insecta	Hymenoptera	Megachilidae	Osmia	Osmia bicornis
XP_003702820.1	Megachile rotundata	143995	GLTP	Animalia	Arthropoda	Insecta	Hymenoptera	Megachilidae	Megachile	Megachile rotundata
XP_003426637.1	Nasonia vitripennis	7425	GLTP	Animalia	Arthropoda	Insecta	Hymenoptera	Pteromalidae	Nasonia	Nasonia vitripennis
OXU20332.1	Trichomalopsis sarcophagae	543379	GLTP	Animalia	Arthropoda	Insecta	Hymenoptera	Pteromalidae	Trichomalopsis	Trichomalopsis sarcophagae
XP_012263217.1	Athalia rosae	37344	GLTP	Animalia	Arthropoda	Insecta	Hymenoptera	Tenthredinidae	Athalia	Athalia rosae
XP_014236287.1	Trichogramma pretiosum	7493	GLTP	Animalia	Arthropoda	Insecta	Hymenoptera	Trichogrammatidae	Trichogramma	Trichogramma pretiosum
XP_015191808.1	Polistes dominula	743375	GLTP	Animalia	Arthropoda	Insecta	Hymenoptera	Vespidae	Polistes	Polistes dominula
XP_014603342.1	Polistes canadensis	91411	GLTP	Animalia	Arthropoda	Insecta	Hymenoptera	Vespidae	Polistes	Polistes canadensis
XP_028165544.1	Ostrinia furnacalis	93504	GLTP	Animalia	Arthropoda	Insecta	Lepidoptera	Crambidae	Ostrinia	Ostrinia furnacalis
RVE49174.1	Chilo suppressalis	168631	GLTP	Animalia	Arthropoda	Insecta	Lepidoptera	Crambidae	Chilo	Chilo suppressalis
XP_026743710.1	Trichoplusia ni	7111	GLTP	Animalia	Arthropoda	Insecta	Lepidoptera	Noctuidae	Trichoplusia	Trichoplusia ni
XP_022816112.1	Spodoptera litura	69820	GLTP	Animalia	Arthropoda	Insecta	Lepidoptera	Noctuidae	Spodoptera	Spodoptera litura
XP_021196766.1	Helicoverpa armigera	29058	GLTP	Animalia	Arthropoda	Insecta	Lepidoptera	Noctuidae	Helicoverpa	Helicoverpa armigera
PCG79049.1	Heliothis virescens	7102	GLTP	Animalia	Arthropoda	Insecta	Lepidoptera	Noctuidae	Heliothis	Heliothis virescens
XP_023939742.1	Bicyclus anynana	110368	GLTP	Animalia	Arthropoda	Insecta	Lepidoptera	Nymphalidae	Bicyclus	Bicyclus anynana
XP_014364630.1	Papilio machaon	76193	GLTP	Animalia	Arthropoda	Insecta	Lepidoptera	Papilionidae	Papilio	Papilio machaon
XP_013163156.1	Papilio xuthus	66420	GLTP	Animalia	Arthropoda	Insecta	Lepidoptera	Papilionidae	Papilio	Papilio xuthus
XP_013137532.1	Papilio polytes	76194	GLTP	Animalia	Arthropoda	Insecta	Lepidoptera	Papilionidae	Papilio	Papilio polytes
XP_022119588.1	Pieris rapae	64459	GLTP	Animalia	Arthropoda	Insecta	Lepidoptera	Pieridae	Pieris	Pieris rapae
GBP61982.1	Eumeta japonica	151549	GLTP	Animalia	Arthropoda	Insecta	Lepidoptera	Psychidae	Eumeta	Eumeta japonica
XP_013196227.1	Amyelois transitella	680683	GLTP	Animalia	Arthropoda	Insecta	Lepidoptera	Pyralidae	Amyelois	Amyelois transitella
OQR78416.1	Tropilaelaps mercedesae	418985	GLTP	Animalia	Arthropoda	Arachnida	Mesostigmata	Laelapidae	Tropilaelaps	Tropilaelaps mercedesae
XP_022693278.1	Varroa jacobsoni	62625	GLTP	Animalia	Arthropoda	Arachnida	Mesostigmata	Varroidae	Varroa	Varroa jacobsoni
XP_022648066.1	Varroa destructor	109461	GLTP	Animalia	Arthropoda	Arachnida	Mesostigmata	Varroidae	Varroa	Varroa destructor
XP_022648064.1	Varroa destructor	109461	GLTP	Animalia	Arthropoda	Arachnida	Mesostigmata	Varroidae	Varroa	Varroa destructor
XP_002429162.1	Pediculus humanus corporis	121224	GLTP	Animalia	Arthropoda	Insecta	Phthiraptera	Pediculidae	Pediculus	Pediculus humanus
KPM08399.1	Sarcoptes scabiei	52283	GLTP	Animalia	Arthropoda	Arachnida	Sarcoptiformes	Sarcoptidae	Sarcoptes	Sarcoptes scabiei
XP_026467671.1	Ctenocephalides felis	7515	GLTP	Animalia	Arthropoda	Insecta	Siphonaptera	Pulicidae	Ctenocephalides	Ctenocephalides felis
XP_026276619.1	Frankliniella occidentalis	133901	GLTP	Animalia	Arthropoda	Insecta	Thysanoptera	Thripidae	Frankliniella	Frankliniella occidentalis
RWS29701.1	Leptotrombidium deliense	299467	GLTP	Animalia	Arthropoda	Arachnida	Trombidiformes	Trombiculidae	Leptotrombidium	Leptotrombidium deliense
RXM95330.1	Acipenser ruthenus	7906	GLTP	Animalia	Chordata	Actinopteri	Acipenseriformes	Acipenseridae	Acipenser	Acipenser ruthenus
RXM94572.1	Acipenser ruthenus	7906	GLTP	Animalia	Chordata	Actinopteri	Acipenseriformes	Acipenseridae	Acipenser	Acipenser ruthenus
XP_019637455.1	Branchiostoma belcheri	7741	GLTP	Animalia	Chordata	Branchiostomidae	Amphixiformes	Branchiostomidae	Branchiostoma	Branchiostoma belcheri
XP_019637454.1	Branchiostoma belcheri	7741	GLTP	Animalia	Chordata	Branchiostomidae	Amphixiformes	Branchiostomidae	Branchiostoma	Branchiostoma belcheri
XP_019637453.1	Branchiostoma belcheri	7741	GLTP	Animalia	Chordata	Branchiostomidae	Amphixiformes	Branchiostomidae	Branchiostoma	Branchiostoma belcheri
XP_019637448.1	Branchiostoma belcheri	7741	GLTP	Animalia	Chordata	Branchiostomidae	Amphixiformes	Branchiostomidae	Branchiostoma	Branchiostoma belcheri
XP_019637447.1	Branchiostoma belcheri	7741	GLTP	Animalia	Chordata	Branchiostomidae	Amphixiformes	Branchiostomidae	Branchiostoma	Branchiostoma belcheri
XP_002590442.1	Branchiostoma floridae	7739	GLTP	Animalia	Chordata	Branchiostomidae	Amphixiformes	Branchiostomidae	Branchiostoma	Branchiostoma floridae
XP_002590441.1	Branchiostoma floridae	7739	GLTP	Animalia	Chordata	Branchiostomidae	Amphixiformes	Branchiostomidae	Branchiostoma	Branchiostoma floridae
NP_001008043.1	Xenopus tropicalis	8364	GLTP	Animalia	Chordata	Amphibia	Anura	Pipidae	Xenopus	Xenopus tropicalis
XP_004315837.1	Tursiops truncatus	9739	GLTP	Animalia	Chordata	Mammalia	Cetacea	Delphinidae	Tursiops	Tursiops truncatus
XP_004272321.1	Orcinus orca	9733	GLTP	Animalia	Chordata	Mammalia	Cetacea	Delphinidae	Orcinus	Orcinus orca
XP_007448977.1	Lipotes vexillifer	118797	GLTP	Animalia	Chordata	Mammalia	Cetacea	Lipotidae	Lipotes	Lipotes vexillifer
XP_022454162.1	Delphinapterus leucas	9749	GLTP	Animalia	Chordata	Mammalia	Cetacea	Monodontidae	Delphinapterus	Delphinapterus leucas
TKC42898.1	Monodon monoceros	40151	GLTP	Animalia	Chordata	Mammalia	Cetacea	Monodontidae	Monodon	Monodon monoceros
XP_007129183.1	Physeter catodon	9755	GLTP	Animalia	Chordata	Mammalia	Cetacea	Physeteridae	Physeter	Physeter catodon
XP_007900268.1	Callorhinchus milii	7868	GLTP	Animalia	Chordata	Chondrichthyes	Chimaeriformes	Callorhinchidae	Callorhinchus	Callorhinchus milii
XP_019514086.1	Hipposideros armiger	186990	GLTP	Animalia	Chordata	Mammalia	Chiroptera	Hipposideridae	Hipposideros	Hipposideros armiger
XP_028369102.1	Phyllostomus discolor	89673	GLTP	Animalia	Chordata	Mammalia	Chiroptera	Phyllostomidae	Phyllostomus	Phyllostomus discolor
XP_012697153.1	Clupea harengus	7950	GLTP	Animalia	Chordata	Actinopteri	Clupeiformes	Clupeidae	Clupea	Clupea harengus
XP_028850299.1	Denticeps clupeoides	299321	GLTP	Animalia	Chordata	Actinopteri	Clupeiformes	Denticipitidae	Denticeps	Denticeps clupeoides
XP_028822902.1	Denticeps clupeoides	299321	GLTP	Animalia	Chordata	Actinopteri	Clupeiformes	Denticipitidae	Denticeps	Denticeps clupeoides
XP_005986071.1	Latimeria chalumnae	7897	GLTP	Animalia	Chordata	Sarcopterygii	Coelacanthiformes	Coelacanthidae	Latimeria	Latimeria chalumnae
XP_005986070.1	Latimeria chalumnae	7897	GLTP	Animalia	Chordata	Sarcopterygii	Coelacanthiformes	Coelacanthidae	Latimeria	Latimeria chalumnae
XP_006277850.1	Alligator mississippiensis	8496	GLTP	Animalia	Chordata	Reptilia	Crocodylia	Alligatoridae	Alligator	Alligator mississippiensis
XP_006018900.1	Alligator sinensis	38654	GLTP	Animalia	Chordata	Reptilia	Crocodylia	Alligatoridae	Alligator	Alligator sinensis
XP_019397126.1	Crocodylus porosus	8502	GLTP	Animalia	Chordata	Reptilia	Crocodylia	Crocodylidae	Crocodylus	Crocodylus porosus
XP_019367376.1	Gavialis gangeticus	94835	GLTP	Animalia	Chordata	Reptilia	Crocodylia	Gavialidae	Gavialis	Gavialis gangeticus
XP_027867541.1	Xiphophorus couchianus	32473	GLTP	Animalia	Chordata	Actinopteri	Cyprinodontiformes	Poeciliidae	Xiphophorus	Xiphophorus couchianus
XP_014893409.1	Poecilia latipinna	48699	GLTP	Animalia	Chordata	Actinopteri	Cyprinodontiformes	Poeciliidae	Poecilia	Poecilia latipinna
XP_014830139.1	Poecilia mexicana	48701	GLTP	Animalia	Chordata	Actinopteri	Cyprinodontiformes	Poeciliidae	Poecilia	Poecilia mexicana
XP_008412746.1	Poecilia reticulata	8081	GLTP	Animalia	Chordata	Actinopteri	Cyprinodontiformes	Poeciliidae	Poecilia	Poecilia reticulata
XP_007570844.1	Poecilia formosa	48698	GLTP	Animalia	Chordata	Actinopteri	Cyprinodontiformes	Poeciliidae	Poecilia	Poecilia formosa
XP_005798980.1	Xiphophorus maculatus	8083	GLTP	Animalia	Chordata	Actinopteri	Cyprinodontiformes	Poeciliidae	Xiphophorus	Xiphophorus maculatus
PWA31890.1	Gambusia affinis	33528	GLTP	Animalia	Chordata	Actinopteri	Cyprinodontiformes	Poeciliidae	Gambusia	Gambusia affinis
XP_023354587.1	Sarcophilus harrisii	9305	GLTP	Animalia	Chordata	Mammalia	Dasyuromorphia	Dasyuridae	Sarcophilus	Sarcophilus harrisii
XP_008576366.1	Galeopterus variegatus	482537	GLTP	Animalia	Chordata	Mammalia	Dermoptera	Cynocephalidae	Galeopterus	Galeopterus variegatus
XP_020832074.1	Phascolarctos cinereus	38626	GLTP	Animalia	Chordata	Mammalia	Diprotodontia	Phascolarctidae	Phascolarctos	Phascolarctos cinereus
XP_027711174.1	Vombatus ursinus	29139	GLTP	Animalia	Chordata	Mammalia	Diprotodontia	Vombatidae	Vombatus	Vombatus ursinus
XP_010873644.1	Esox lucius	8010	GLTP	Animalia	Chordata	Actinopteri	Esociformes	Esocidae	Esox	Esox lucius
XP_006885909.1	Elephantulus edwardii	28737	GLTP	Animalia	Chordata	Mammalia	Macroscelidea	Macroscelididae	Elephantulus	Elephantulus edwardii
XP_028911211.1	Ornithorhynchus anatinus	9258	GLTP	Animalia	Chordata	Mammalia	Monotremata	Ornithorhynchidae	Ornithorhynchus	Ornithorhynchus anatinus
XP_028911210.1	Ornithorhynchus anatinus	9258	GLTP	Animalia	Chordata	Mammalia	Monotremata	Ornithorhynchidae	Ornithorhynchus	Ornithorhynchus anatinus
XP_018615877.1	Scleropages formosus	113540	GLTP	Animalia	Chordata	Actinopteri	Osteoglossiformes	Osteoglossidae	Scleropages	Scleropages formosus
XP_027764871.1	Empidonax traillii	164674	GLTP	Animalia	Chordata	Aves	Passeriformes	Tyrannidae	Empidonax	Empidonax traillii
XP_001503584.1	Equus caballus	9796	GLTP	Animalia	Chordata	Mammalia	Perissodactyla	Equidae	Equus	Equus caballus
XP_004425536.1	Ceratotherium simum simum	73337	GLTP	Animalia	Chordata	Mammalia	Perissodactyla	Rhinocerotidae	Ceratotherium	Ceratotherium simum
XP_028663569.1	Erpetoichthys calabaricus	27687	GLTP	Animalia	Chordata	Cladistia	Polypteriformes	Polypteridae	Erpetoichthys	Erpetoichthys calabaricus
XP_028654049.1	Erpetoichthys calabaricus	27687	GLTP	Animalia	Chordata	Cladistia	Polypteriformes	Polypteridae	Erpetoichthys	Erpetoichthys calabaricus
XP_028654048.1	Erpetoichthys calabaricus	27687	GLTP	Animalia	Chordata	Cladistia	Polypteriformes	Polypteridae	Erpetoichthys	Erpetoichthys calabaricus
XP_023048595.1	Piliocolobus tephrosceles	591936	GLTP	Animalia	Chordata	Mammalia	Primates	Cercopithecidae	Piliocolobus	Piliocolobus tephrosceles
XP_008063664.1	Carlito syrichta	1868482	GLTP	Animalia	Chordata	Mammalia	Primates	Tarsiidae	Carlito	Carlito syrichta
XP_010591488.1	Loxodonta africana	9785	GLTP	Animalia	Chordata	Mammalia	Proboscidea	Elephantidae	Loxodonta	Loxodonta africana
XP_005079285.1	Mesocricetus auratus	10036	GLTP	Animalia	Chordata	Mammalia	Rodentia	Cricetidae	Mesocricetus	Mesocricetus auratus
XP_012869664.1	Dipodomys ordii	10020	GLTP	Animalia	Chordata	Mammalia	Rodentia	Heteromyidae	Dipodomys	Dipodomys ordii
XP_021511530.1	Meriones unguiculatus	10047	GLTP	Animalia	Chordata	Mammalia	Rodentia	Muridae	Meriones	Meriones unguiculatus
XP_021056316.1	Mus pahari	10093	GLTP	Animalia	Chordata	Mammalia	Rodentia	Muridae	Mus	Mus pahari
XP_021032871.1	Mus caroli	10089	GLTP	Animalia	Chordata	Mammalia	Rodentia	Muridae	Mus	Mus caroli
XP_021017150.1	Mus caroli	10089	GLTP	Animalia	Chordata	Mammalia	Rodentia	Muridae	Mus	Mus caroli
NP_077792.2	Mus musculus	10090	GLTP	Animalia	Chordata	Mammalia	Rodentia	Muridae	Mus	Mus musculus
AAH02216.1	Mus musculus	10090	GLTP	Animalia	Chordata	Mammalia	Rodentia	Muridae	Mus	Mus musculus
4KBR_A	Mus musculus	10090	GLTP	Animalia	Chordata	Mammalia	Rodentia	Muridae	Mus	Mus musculus
XP_008850801.1	Nannospalax galili	1026970	GLTP	Animalia	Chordata	Mammalia	Rodentia	Spalacidae	Nannospalax	Nannospalax galili
XP_024231926.1	Oncorhynchus tshawytscha	74940	GLTP	Animalia	Chordata	Actinopteri	Salmoniformes	Salmonidae	Oncorhynchus	Oncorhynchus tshawytscha
XP_023847383.1	Salvelinus alpinus	8036	GLTP	Animalia	Chordata	Actinopteri	Salmoniformes	Salmonidae	Salvelinus	Salvelinus alpinus
XP_020362396.1	Oncorhynchus kisutch	8019	GLTP	Animalia	Chordata	Actinopteri	Salmoniformes	Salmonidae	Oncorhynchus	Oncorhynchus kisutch
XP_014002315.1	Salmo salar	8030	GLTP	Animalia	Chordata	Actinopteri	Salmoniformes	Salmonidae	Salmo	Salmo salar
XP_027000696.1	Tachysurus fulvidraco	1234273	GLTP	Animalia	Chordata	Actinopteri	Siluriformes	Bagridae	Tachysurus	Tachysurus fulvidraco
XP_004384399.1	Trichechus manatus latirostris	127582	GLTP	Animalia	Chordata	Mammalia	Sirenia	Trichechidae	Trichechus	Trichechus manatus
XP_020637961.1	Pogona vitticeps	103695	GLTP	Animalia	Chordata	Reptilia	Squamata	Agamidae	Pogona	Pogona vitticeps
XP_003228978.1	Anolis carolinensis	28377	GLTP	Animalia	Chordata	Reptilia	Squamata	Dactyloidae	Anolis	Anolis carolinensis
XP_015276099.1	Gekko japonicus	146911	GLTP	Animalia	Chordata	Reptilia	Squamata	Gekkonidae	Gekko	Gekko japonicus
XP_027688131.1	Chelonia mydas	8469	GLTP	Animalia	Chordata	Reptilia	Testudines	Cheloniidae	Chelonia	Chelonia mydas
XP_007943595.1	Orycteropus afer afer	1230840	GLTP	Animalia	Chordata	Mammalia	Tubulidentata	Orycteropodidae	Orycteropus	Orycteropus afer
XP_019831760.1	Bos indicus	9915	GLTP	Animalia	Chordata	Mammalia	Artiodactyla	Bovidae	Bos	Bos indicus
XP_014338349.1	Bos mutus	72004	GLTP	Animalia	Chordata	Mammalia	Artiodactyla	Bovidae	Bos	Bos mutus
XP_011993908.1	Ovis aries musimon	9938	GLTP	Animalia	Chordata	Mammalia	Artiodactyla	Bovidae	Ovis	Ovis aries
XP_010848314.1	Bison bison bison	43346	GLTP	Animalia	Chordata	Mammalia	Artiodactyla	Bovidae	Bison	Bison bison
XP_006066988.1	Bubalus bubalis	89462	GLTP	Animalia	Chordata	Mammalia	Artiodactyla	Bovidae	Bubalus	Bubalus bubalis
XP_005966318.1	Pantholops hodgsonii	59538	GLTP	Animalia	Chordata	Mammalia	Artiodactyla	Bovidae	Pantholops	Pantholops hodgsonii
XP_005966317.1	Pantholops hodgsonii	59538	GLTP	Animalia	Chordata	Mammalia	Artiodactyla	Bovidae	Pantholops	Pantholops hodgsonii
XP_005888922.1	Bos mutus	72004	GLTP	Animalia	Chordata	Mammalia	Artiodactyla	Bovidae	Bos	Bos mutus
NP_001068650.1	Bos taurus	9913	GLTP	Animalia	Chordata	Mammalia	Artiodactyla	Bovidae	Bos	Bos taurus
XP_010997679.1	Camelus dromedarius	9838	GLTP	Animalia	Chordata	Mammalia	Artiodactyla	Camelidae	Camelus	Camelus dromedarius
XP_006196638.1	Vicugna pacos	30538	GLTP	Animalia	Chordata	Mammalia	Artiodactyla	Camelidae	Vicugna	Vicugna pacos
XP_006175460.1	Camelus ferus	419612	GLTP	Animalia	Chordata	Mammalia	Artiodactyla	Camelidae	Camelus	Camelus ferus
XP_018542368.1	Lates calcarifer	8187	GLTP	Animalia	Chordata	Actinopteri	-	Centropomidae	Lates	Lates calcarifer
XP_020729492.1	Odocoileus virginianus texanus	9880	GLTP	Animalia	Chordata	Mammalia	Artiodactyla	Cervidae	Odocoileus	Odocoileus virginianus
XP_020729489.1	Odocoileus virginianus texanus	9880	GLTP	Animalia	Chordata	Mammalia	Artiodactyla	Cervidae	Odocoileus	Odocoileus virginianus
OWK08624.1	Cervus elaphus hippelaphus	46360	GLTP	Animalia	Chordata	Mammalia	Artiodactyla	Cervidae	Cervus	Cervus elaphus
XP_006871769.1	Chrysochloris asiatica	185453	GLTP	Animalia	Chordata	Mammalia	Artiodactyla	Chrysochloridae	Chrysochloris	Chrysochloris asiatica
XP_027132220.1	Larimichthys crocea	215358	GLTP	Animalia	Chordata	Actinopteri	Perciformes	Sciaenidae	Larimichthys	Larimichthys crocea
TKS93319.1	Collichthys lucidus	240159	GLTP	Animalia	Chordata	Actinopteri	Perciformes	Sciaenidae	Collichthys	Collichthys lucidus
TKS93310.1	Collichthys lucidus	240159	GLTP	Animalia	Chordata	Actinopteri	Perciformes	Sciaenidae	Collichthys	Collichthys lucidus
XP_002160351.1	Hydra vulgaris	6087	GLTP	Animalia	Cnidaria	Hydrozoa	Anthoathecata	Hydridae	Hydra	Hydra vulgaris
XP_022094162.1	Acanthaster planci	133434	GLTP	Animalia	Echinodermata	Asteroidea	Valvatida	Acanthasteridae	Acanthaster	Acanthaster planci
XP_005100179.1	Aplysia californica	6500	GLTP	Animalia	Mollusca	Gastropoda	Aplysiida	Aplysiidae	Aplysia	Aplysia californica
XP_025084092.1	Pomacea canaliculata	400727	GLTP	Animalia	Mollusca	Gastropoda	Architaenioglossa	Ampullariidae	Pomacea	Pomacea canaliculata
XP_025084090.1	Pomacea canaliculata	400727	GLTP	Animalia	Mollusca	Gastropoda	Architaenioglossa	Ampullariidae	Pomacea	Pomacea canaliculata
XP_025082950.1	Pomacea canaliculata	400727	GLTP	Animalia	Mollusca	Gastropoda	Architaenioglossa	Ampullariidae	Pomacea	Pomacea canaliculata
XP_011452284.1	Crassostrea gigas	29159	GLTP	Animalia	Mollusca	Bivalvia	Ostreoida	Ostreidae	Crassostrea	Crassostrea gigas
XP_021375510.1	Mizuhopecten yessoensis	6573	GLTP	Animalia	Mollusca	Bivalvia	Pectinoida	Pectinidae	Mizuhopecten	Mizuhopecten yessoensis
OWF39840.1	Mizuhopecten yessoensis	6573	GLTP	Animalia	Mollusca	Bivalvia	Pectinoida	Pectinidae	Mizuhopecten	Mizuhopecten yessoensis
XP_024506856.1	Strongyloides ratti	34506	GLTP	Animalia	Nematoda	Chromadorea	Rhabditida	Strongyloididae	Strongyloides	Strongyloides ratti
EYC38737.1	Ancylostoma ceylanicum	53326	GLTP	Animalia	Nematoda	Chromadorea	Strongylida	Ancylostomatidae	Ancylostoma	Ancylostoma ceylanicum
EYC38736.1	Ancylostoma ceylanicum	53326	GLTP	Animalia	Nematoda	Chromadorea	Strongylida	Ancylostomatidae	Ancylostoma	Ancylostoma ceylanicum
EYC38731.1	Ancylostoma ceylanicum	53326	GLTP	Animalia	Nematoda	Chromadorea	Strongylida	Ancylostomatidae	Ancylostoma	Ancylostoma ceylanicum
VDM64007.1	Angiostrongylus costaricensis	334426	GLTP	Animalia	Nematoda	Chromadorea	Strongylida	Angiostrongylidae	Angiostrongylus	Angiostrongylus costaricensis
CAR63681.1	Angiostrongylus cantonensis	6313	GLTP	Animalia	Nematoda	Chromadorea	Strongylida	Angiostrongylidae	Angiostrongylus	Angiostrongylus cantonensis
KJH42643.1	Dictyocaulus viviparus	29172	GLTP	Animalia	Nematoda	Chromadorea	Strongylida	Dictyocaulidae	Dictyocaulus	Dictyocaulus viviparus
VDO83456.1	Haemonchus placei	6290	GLTP	Animalia	Nematoda	Chromadorea	Strongylida	Haemonchidae	Haemonchus	Haemonchus placei
CDJ98015.1	Haemonchus contortus	6289	GLTP	Animalia	Nematoda	Chromadorea	Strongylida	Haemonchidae	Haemonchus	Haemonchus contortus
VDL72026.1	Nippostrongylus brasiliensis	27835	GLTP	Animalia	Nematoda	Chromadorea	Strongylida	Heligmonellidae	Nippostrongylus	Nippostrongylus brasiliensis
VDO78003.1	Heligmosomoides polygyrus	6339	GLTP	Animalia	Nematoda	Chromadorea	Strongylida	Heligmosomatidae	Heligmosomoides	Heligmosomoides polygyrus
OUC48144.1	Trichinella nativa	6335	GLTP	Animalia	Nematoda	Enoplea	Trichinellida	Trichinellidae	Trichinella	Trichinella nativa
KRX90445.1	Trichinella pseudospiralis	6337	GLTP	Animalia	Nematoda	Enoplea	Trichinellida	Trichinellidae	Trichinella	Trichinella pseudospiralis
CDW52571.1	Trichuris trichiura	36087	GLTP	Animalia	Nematoda	Enoplea	Trichinellida	Trichuridae	Trichuris	Trichuris trichiura
XP_002113832.1	Trichoplax adhaerens	10228	GLTP	Animalia	Placozoa	-	-	Trichoplacidae	Trichoplax	Trichoplax adhaerens
RDD44254.1	Trichoplax sp. H2	287889	GLTP	Animalia	Placozoa	-	-	Trichoplacidae	Trichoplax	Trichoplax sp. H2
VDD75491.1	Mesocestoides corti	53468	GLTP	Animalia	Platyhelminthes	Cestoda	Cyclophyllidea	Mesocestoididae	Mesocestoides	Mesocestoides corti
PAA62979.1	Macrostomum lignano	282301	GLTP	Animalia	Platyhelminthes	Rhabditophora	Macrostomida	Macrostomidae	Macrostomum	Macrostomum lignano
PAA53336.1	Macrostomum lignano	282301	GLTP	Animalia	Platyhelminthes	Rhabditophora	Macrostomida	Macrostomidae	Macrostomum	Macrostomum lignano
THD21880.1	Fasciola hepatica	6192	GLTP	Animalia	Platyhelminthes	Trematoda	Plagiorchiida	Fasciolidae	Fasciola	Fasciola hepatica
XP_018646652.1	Schistosoma mansoni	6183	GLTP	Animalia	Platyhelminthes	Trematoda	Strigeidida	Schistosomatidae	Schistosoma	Schistosoma mansoni
XP_012797856.1	Schistosoma haematobium	6185	GLTP	Animalia	Platyhelminthes	Trematoda	Strigeidida	Schistosomatidae	Schistosoma	Schistosoma haematobium
VDQ04525.1	Trichobilharzia regenti	157069	GLTP	Animalia	Platyhelminthes	Trematoda	Strigeidida	Schistosomatidae	Trichobilharzia	Trichobilharzia regenti
VDP67698.1	Schistosoma mattheei	31246	GLTP	Animalia	Platyhelminthes	Trematoda	Strigeidida	Schistosomatidae	Schistosoma	Schistosoma mattheei
CAX73460.1	Schistosoma japonicum	6182	GLTP	Animalia	Platyhelminthes	Trematoda	Strigeidida	Schistosomatidae	Schistosoma	Schistosoma japonicum
RMZ99561.1	Brachionus plicatilis	10195	GLTP	Animalia	Rotifera	Monogononta	Ploima	Brachionidae	Brachionus	Brachionus plicatilis
AIU50568.1	Acorus calamus	4465	GLTP	Viridiplantae	Streptophyta	Monocots	Acorales	Acoraceae	Acorus	Acorus calamus
AIU50612.1	Alisma plantago-aquatica	15000	GLTP	Viridiplantae	Streptophyta	Monocots	Alismatales	Alismataceae	Alisma	Alisma plantago-aquatica
AIU50566.1	Pinellia ternata	199225	GLTP	Viridiplantae	Streptophyta	Monocots	Alismatales	Araceae	Pinellia	Pinellia ternata
KMZ76163.1	Zostera marina	29655	GLTP	Viridiplantae	Streptophyta	Monocots	Alismatales	Zosteraceae	Zostera	Zostera marina
KMZ76161.1	Zostera marina	29655	GLTP	Viridiplantae	Streptophyta	Monocots	Alismatales	Zosteraceae	Zostera	Zostera marina
KMZ75705.1	Zostera marina	29655	GLTP	Viridiplantae	Streptophyta	Monocots	Alismatales	Zosteraceae	Zostera	Zostera marina
KMZ71729.1	Zostera marina	29655	GLTP	Viridiplantae	Streptophyta	Monocots	Alismatales	Zosteraceae	Zostera	Zostera marina
KMZ65804.1	Zostera marina	29655	GLTP	Viridiplantae	Streptophyta	Monocots	Alismatales	Zosteraceae	Zostera	Zostera marina
KMZ58792.1	Zostera marina	29655	GLTP	Viridiplantae	Streptophyta	Monocots	Alismatales	Zosteraceae	Zostera	Zostera marina
XP_020523453.1	Amborella trichopoda	13333	GLTP	Viridiplantae	Streptophyta	-	Amborellales	Amborellaceae	Amborella	Amborella trichopoda
XP_020523452.1	Amborella trichopoda	13333	GLTP	Viridiplantae	Streptophyta	-	Amborellales	Amborellaceae	Amborella	Amborella trichopoda
XP_020523451.1	Amborella trichopoda	13333	GLTP	Viridiplantae	Streptophyta	-	Amborellales	Amborellaceae	Amborella	Amborella trichopoda
XP_006846031.2	Amborella trichopoda	13333	GLTP	Viridiplantae	Streptophyta	-	Amborellales	Amborellaceae	Amborella	Amborella trichopoda
XP_006845214.1	Amborella trichopoda	13333	GLTP	Viridiplantae	Streptophyta	-	Amborellales	Amborellaceae	Amborella	Amborella trichopoda
ERN07706.1	Amborella trichopoda	13333	GLTP	Viridiplantae	Streptophyta	-	Amborellales	Amborellaceae	Amborella	Amborella trichopoda
XP_017220663.1	Daucus carota subsp. sativus	79200	GLTP	Viridiplantae	Streptophyta	Dicots	Apiales	Apiaceae	Daucus	Daucus carota
AIU50613.1	Trachycarpus fortunei	14027	GLTP	Viridiplantae	Streptophyta	Monocots	Arecales	Arecaceae	Trachycarpus	Trachycarpus fortunei
XP_019708852.1	Elaeis guineensis	51953	GLTP	Viridiplantae	Streptophyta	Monocots	Arecales	Arecaceae	Elaeis	Elaeis guineensis
XP_019708824.1	Elaeis guineensis	51953	GLTP	Viridiplantae	Streptophyta	Monocots	Arecales	Arecaceae	Elaeis	Elaeis guineensis
XP_010923671.1	Elaeis guineensis	51953	GLTP	Viridiplantae	Streptophyta	Monocots	Arecales	Arecaceae	Elaeis	Elaeis guineensis
XP_008794458.1	Phoenix dactylifera	42345	GLTP	Viridiplantae	Streptophyta	Monocots	Arecales	Arecaceae	Phoenix	Phoenix dactylifera
AIU50600.1	Yucca filamentosa	55960	GLTP	Viridiplantae	Streptophyta	Monocots	Asparagales	Asparagaceae	Yucca	Yucca filamentosa
XP_020269962.1	Asparagus officinalis	4686	GLTP	Viridiplantae	Streptophyta	Monocots	Asparagales	Asparagaceae	Asparagus	Asparagus officinalis
ONK67339.1	Asparagus officinalis	4686	GLTP	Viridiplantae	Streptophyta	Monocots	Asparagales	Asparagaceae	Asparagus	Asparagus officinalis
AIU50584.1	Asparagus officinalis	4686	GLTP	Viridiplantae	Streptophyta	Monocots	Asparagales	Asparagaceae	Asparagus	Asparagus officinalis
AIU50579.1	Iris japonica	203638	GLTP	Viridiplantae	Streptophyta	Monocots	Asparagales	Iridaceae	Iris	Iris japonica
PKA61987.1	Apostasia shenzhenica	1088818	GLTP	Viridiplantae	Streptophyta	Monocots	Asparagales	Orchidaceae	Apostasia	Apostasia shenzhenica
XP_020686377.1	Dendrobium catenatum	906689	GLTP	Viridiplantae	Streptophyta	Monocots	Asparagales	Orchidaceae	Dendrobium	Dendrobium catenatum
XP_020591820.1	Phalaenopsis equestris	78828	GLTP	Viridiplantae	Streptophyta	Monocots	Asparagales	Orchidaceae	Phalaenopsis	Phalaenopsis equestris
PWA85271.1	Artemisia annua	35608	GLTP	Viridiplantae	Streptophyta	Dicots	Asterales	Asteraceae	Artemisia	Artemisia annua
PWA85270.1	Artemisia annua	35608	GLTP	Viridiplantae	Streptophyta	Dicots	Asterales	Asteraceae	Artemisia	Artemisia annua
PWA37279.1	Artemisia annua	35608	GLTP	Viridiplantae	Streptophyta	Dicots	Asterales	Asteraceae	Artemisia	Artemisia annua
AIU50597.1	Artemisia annua	35608	GLTP	Viridiplantae	Streptophyta	Dicots	Asterales	Asteraceae	Artemisia	Artemisia annua
XP_024968260.1	Cynara cardunculus var. scolymus	59895	GLTP	Viridiplantae	Streptophyta	Dicots	Asterales	Asteraceae	Cynara	Cynara cardunculus
XP_022000814.1	Helianthus annuus	4232	GLTP	Viridiplantae	Streptophyta	Dicots	Asterales	Asteraceae	Helianthus	Helianthus annuus
XP_023761113.1	Lactuca sativa	4236	GLTP	Viridiplantae	Streptophyta	Dicots	Asterales	Asteraceae	Lactuca	Lactuca sativa
AIU50605.1	Lactuca sativa	4236	GLTP	Viridiplantae	Streptophyta	Dicots	Asterales	Asteraceae	Lactuca	Lactuca sativa
AIU50577.1	Illicium henryi	114516	GLTP	Viridiplantae	Streptophyta	Dicots	Austrobaileyales	Schisandraceae	Illicium	Illicium henryi
XP_020885164.1	Arabidopsis lyrata subsp. lyrata	81972	GLTP	Viridiplantae	Streptophyta	Dicots	Brassicales	Brassicaceae	Arabidopsis	Arabidopsis lyrata
XP_020871247.1	Arabidopsis lyrata subsp. lyrata	81972	GLTP	Viridiplantae	Streptophyta	Dicots	Brassicales	Brassicaceae	Arabidopsis	Arabidopsis lyrata
XP_020867211.1	Arabidopsis lyrata subsp. lyrata	81972	GLTP	Viridiplantae	Streptophyta	Dicots	Brassicales	Brassicaceae	Arabidopsis	Arabidopsis lyrata
XP_020867203.1	Arabidopsis lyrata subsp. lyrata	81972	GLTP	Viridiplantae	Streptophyta	Dicots	Brassicales	Brassicaceae	Arabidopsis	Arabidopsis lyrata
XP_002865182.2	Arabidopsis lyrata subsp. lyrata	81972	GLTP	Viridiplantae	Streptophyta	Dicots	Brassicales	Brassicaceae	Arabidopsis	Arabidopsis lyrata
XP_002865177.1	Arabidopsis lyrata subsp. lyrata	81972	GLTP	Viridiplantae	Streptophyta	Dicots	Brassicales	Brassicaceae	Arabidopsis	Arabidopsis lyrata
EFH41441.1	Arabidopsis lyrata subsp. lyrata	81972	GLTP	Viridiplantae	Streptophyta	Dicots	Brassicales	Brassicaceae	Arabidopsis	Arabidopsis lyrata
EFH41439.1	Arabidopsis lyrata subsp. lyrata	81972	GLTP	Viridiplantae	Streptophyta	Dicots	Brassicales	Brassicaceae	Arabidopsis	Arabidopsis lyrata
OAP07114.1	Arabidopsis thaliana	3702	GLTP	Viridiplantae	Streptophyta	Dicots	Brassicales	Brassicaceae	Arabidopsis	Arabidopsis thaliana
NP_181016.1	Arabidopsis thaliana	3702	GLTP	Viridiplantae	Streptophyta	Dicots	Brassicales	Brassicaceae	Arabidopsis	Arabidopsis thaliana
AIU50562.1	Arabidopsis thaliana	3702	GLTP	Viridiplantae	Streptophyta	Dicots	Brassicales	Brassicaceae	Arabidopsis	Arabidopsis thaliana
4NTI_A	Arabidopsis thaliana	3702	GLTP	Viridiplantae	Streptophyta	Dicots	Brassicales	Brassicaceae	Arabidopsis	Arabidopsis thaliana
4NTG_A	Arabidopsis thaliana	3702	GLTP	Viridiplantae	Streptophyta	Dicots	Brassicales	Brassicaceae	Arabidopsis	Arabidopsis thaliana
4NT2_A	Arabidopsis thaliana	3702	GLTP	Viridiplantae	Streptophyta	Dicots	Brassicales	Brassicaceae	Arabidopsis	Arabidopsis thaliana
4NT1_A	Arabidopsis thaliana	3702	GLTP	Viridiplantae	Streptophyta	Dicots	Brassicales	Brassicaceae	Arabidopsis	Arabidopsis thaliana
KFK36375.1	Arabis alpina	50452	GLTP	Viridiplantae	Streptophyta	Dicots	Brassicales	Brassicaceae	Arabis	Arabis alpina
RQL98488.1	Brassica cretica	69181	GLTP	Viridiplantae	Streptophyta	Dicots	Brassicales	Brassicaceae	Brassica	Brassica cretica
XP_022551205.1	Brassica napus	3708	GLTP	Viridiplantae	Streptophyta	Dicots	Brassicales	Brassicaceae	Brassica	Brassica napus
XP_013734274.1	Brassica napus	3708	GLTP	Viridiplantae	Streptophyta	Dicots	Brassicales	Brassicaceae	Brassica	Brassica napus
XP_013675164.1	Brassica napus	3708	GLTP	Viridiplantae	Streptophyta	Dicots	Brassicales	Brassicaceae	Brassica	Brassica napus
XP_013675029.1	Brassica napus	3708	GLTP	Viridiplantae	Streptophyta	Dicots	Brassicales	Brassicaceae	Brassica	Brassica napus
CDY43977.1	Brassica napus	3708	GLTP	Viridiplantae	Streptophyta	Dicots	Brassicales	Brassicaceae	Brassica	Brassica napus
XP_013622513.1	Brassica oleracea var. oleracea	109376	GLTP	Viridiplantae	Streptophyta	Dicots	Brassicales	Brassicaceae	Brassica	Brassica oleracea
XP_013619683.1	Brassica oleracea var. oleracea	109376	GLTP	Viridiplantae	Streptophyta	Dicots	Brassicales	Brassicaceae	Brassica	Brassica oleracea
XP_013610441.1	Brassica oleracea var. oleracea	109376	GLTP	Viridiplantae	Streptophyta	Dicots	Brassicales	Brassicaceae	Brassica	Brassica oleracea
VDD25376.1	Brassica oleracea	3712	GLTP	Viridiplantae	Streptophyta	Dicots	Brassicales	Brassicaceae	Brassica	Brassica oleracea
VDD06410.1	Brassica oleracea	3712	GLTP	Viridiplantae	Streptophyta	Dicots	Brassicales	Brassicaceae	Brassica	Brassica oleracea
VDC89009.1	Brassica oleracea	3712	GLTP	Viridiplantae	Streptophyta	Dicots	Brassicales	Brassicaceae	Brassica	Brassica oleracea
XP_009143749.1	Brassica rapa	3711	GLTP	Viridiplantae	Streptophyta	Dicots	Brassicales	Brassicaceae	Brassica	Brassica rapa
XP_009132997.1	Brassica rapa	3711	GLTP	Viridiplantae	Streptophyta	Dicots	Brassicales	Brassicaceae	Brassica	Brassica rapa
XP_009128867.1	Brassica rapa	3711	GLTP	Viridiplantae	Streptophyta	Dicots	Brassicales	Brassicaceae	Brassica	Brassica rapa
XP_009128861.1	Brassica rapa	3711	GLTP	Viridiplantae	Streptophyta	Dicots	Brassicales	Brassicaceae	Brassica	Brassica rapa
VDC79961.1	Brassica rapa	3711	GLTP	Viridiplantae	Streptophyta	Dicots	Brassicales	Brassicaceae	Brassica	Brassica rapa
RID75891.1	Brassica rapa	3711	GLTP	Viridiplantae	Streptophyta	Dicots	Brassicales	Brassicaceae	Brassica	Brassica rapa
RID75888.1	Brassica rapa	3711	GLTP	Viridiplantae	Streptophyta	Dicots	Brassicales	Brassicaceae	Brassica	Brassica rapa
XP_010504940.1	Camelina sativa	90675	GLTP	Viridiplantae	Streptophyta	Dicots	Brassicales	Brassicaceae	Camelina	Camelina sativa
XP_006294793.2	Capsella rubella	81985	GLTP	Viridiplantae	Streptophyta	Dicots	Brassicales	Brassicaceae	Capsella	Capsella rubella
XP_006279747.1	Capsella rubella	81985	GLTP	Viridiplantae	Streptophyta	Dicots	Brassicales	Brassicaceae	Capsella	Capsella rubella
EOA27691.1	Capsella rubella	81985	GLTP	Viridiplantae	Streptophyta	Dicots	Brassicales	Brassicaceae	Capsella	Capsella rubella
AIU50573.1	Capsella rubella	81985	GLTP	Viridiplantae	Streptophyta	Dicots	Brassicales	Brassicaceae	Capsella	Capsella rubella
XP_024003728.1	Eutrema salsugineum	72664	GLTP	Viridiplantae	Streptophyta	Dicots	Brassicales	Brassicaceae	Eutrema	Eutrema salsugineum
XP_006398346.2	Eutrema salsugineum	72664	GLTP	Viridiplantae	Streptophyta	Dicots	Brassicales	Brassicaceae	Eutrema	Eutrema salsugineum
ESQ52070.1	Eutrema salsugineum	72664	GLTP	Viridiplantae	Streptophyta	Dicots	Brassicales	Brassicaceae	Eutrema	Eutrema salsugineum
ESQ39799.1	Eutrema salsugineum	72664	GLTP	Viridiplantae	Streptophyta	Dicots	Brassicales	Brassicaceae	Eutrema	Eutrema salsugineum
XP_018475733.1	Raphanus sativus	3726	GLTP	Viridiplantae	Streptophyta	Dicots	Brassicales	Brassicaceae	Raphanus	Raphanus sativus
XP_018475724.1	Raphanus sativus	3726	GLTP	Viridiplantae	Streptophyta	Dicots	Brassicales	Brassicaceae	Raphanus	Raphanus sativus
XP_018441636.1	Raphanus sativus	3726	GLTP	Viridiplantae	Streptophyta	Dicots	Brassicales	Brassicaceae	Raphanus	Raphanus sativus
XP_018438372.1	Raphanus sativus	3726	GLTP	Viridiplantae	Streptophyta	Dicots	Brassicales	Brassicaceae	Raphanus	Raphanus sativus
XP_018435769.1	Raphanus sativus	3726	GLTP	Viridiplantae	Streptophyta	Dicots	Brassicales	Brassicaceae	Raphanus	Raphanus sativus
AIU50604.1	Schrenkiella parvula	98039	GLTP	Viridiplantae	Streptophyta	Dicots	Brassicales	Brassicaceae	Schrenkiella	Schrenkiella parvula
AIU50561.1	Arabidopsis lyrata	59689	GLTP	Viridiplantae	Streptophyta	Dicots	Brassicales	Brassicaceae	Arabidopsis	Arabidopsis lyrata
XP_021904722.1	Carica papaya	3649	GLTP	Viridiplantae	Streptophyta	Dicots	Brassicales	Caricaceae	Carica	Carica papaya
AIU50572.1	Carica papaya	3649	GLTP	Viridiplantae	Streptophyta	Dicots	Brassicales	Caricaceae	Carica	Carica papaya
XP_010540612.1	Tarenaya hassleriana	28532	GLTP	Viridiplantae	Streptophyta	Dicots	Brassicales	Cleomaceae	Tarenaya	Tarenaya hassleriana
XP_010538264.1	Tarenaya hassleriana	28532	GLTP	Viridiplantae	Streptophyta	Dicots	Brassicales	Cleomaceae	Tarenaya	Tarenaya hassleriana
AIU50578.1	Buxus sinica	153572	GLTP	Viridiplantae	Streptophyta	Dicots	Buxales	Buxaceae	Buxus	Buxus sinica
XP_010686648.1	Beta vulgaris subsp. vulgaris	3555	GLTP	Viridiplantae	Streptophyta	Dicots	Caryophyllales	Chenopodiaceae	Beta	Beta vulgaris
XP_010666807.1	Beta vulgaris subsp. vulgaris	3555	GLTP	Viridiplantae	Streptophyta	Dicots	Caryophyllales	Chenopodiaceae	Beta	Beta vulgaris
XP_021766760.1	Chenopodium quinoa	63459	GLTP	Viridiplantae	Streptophyta	Dicots	Caryophyllales	Chenopodiaceae	Chenopodium	Chenopodium quinoa
XP_021719819.1	Chenopodium quinoa	63459	GLTP	Viridiplantae	Streptophyta	Dicots	Caryophyllales	Chenopodiaceae	Chenopodium	Chenopodium quinoa
XP_021865340.1	Spinacia oleracea	3562	GLTP	Viridiplantae	Streptophyta	Dicots	Caryophyllales	Chenopodiaceae	Spinacia	Spinacia oleracea
AIU50606.1	Ceratophyllum platyacanthum subsp. oryzetorum	1560471	GLTP	Viridiplantae	Streptophyta	-	Ceratophyllales	Ceratophyllaceae	Ceratophyllum	Ceratophyllum platyacanthum
AIU50581.1	Ceratophyllum demersum	4428	GLTP	Viridiplantae	Streptophyta	-	Ceratophyllales	Ceratophyllaceae	Ceratophyllum	Ceratophyllum demersum
GBG79538.1	Chara braunii	69332	GLTP	Viridiplantae	Streptophyta	Charophyceae	Charales	Characeae	Chara	Chara braunii
AIU50580.1	Chloranthus japonicus	13007	GLTP	Viridiplantae	Streptophyta	-	Chloranthales	Chloranthaceae	Chloranthus	Chloranthus japonicus
AIU50569.1	Sarcandra glabra	92927	GLTP	Viridiplantae	Streptophyta	-	Chloranthales	Chloranthaceae	Sarcandra	Sarcandra glabra
XP_008458024.1	Cucumis melo	3656	GLTP	Viridiplantae	Streptophyta	Dicots	Cucurbitales	Cucurbitaceae	Cucumis	Cucumis melo
XP_004139630.1	Cucumis sativus	3659	GLTP	Viridiplantae	Streptophyta	Dicots	Cucurbitales	Cucurbitaceae	Cucumis	Cucumis sativus
XP_022974080.1	Cucurbita maxima	3661	GLTP	Viridiplantae	Streptophyta	Dicots	Cucurbitales	Cucurbitaceae	Cucurbita	Cucurbita maxima
XP_022930192.1	Cucurbita moschata	3662	GLTP	Viridiplantae	Streptophyta	Dicots	Cucurbitales	Cucurbitaceae	Cucurbita	Cucurbita moschata
XP_023536602.1	Cucurbita pepo subsp. pepo	3664	GLTP	Viridiplantae	Streptophyta	Dicots	Cucurbitales	Cucurbitaceae	Cucurbita	Cucurbita pepo
XP_022139848.1	Momordica charantia	3673	GLTP	Viridiplantae	Streptophyta	Dicots	Cucurbitales	Cucurbitaceae	Momordica	Momordica charantia
AIU50599.1	Dioscorea oppositifolia	569628	GLTP	Viridiplantae	Streptophyta	Monocots	Dioscoreales	Dioscoreaceae	Dioscorea	Dioscorea oppositifolia
PSS04941.1	Actinidia chinensis var. chinensis	1590841	GLTP	Viridiplantae	Streptophyta	Dicots	Ericales	Actinidiaceae	Actinidia	Actinidia chinensis
XP_028114320.1	Camellia sinensis	4442	GLTP	Viridiplantae	Streptophyta	Dicots	Ericales	Theaceae	Camellia	Camellia sinensis
XP_027338825.1	Abrus precatorius	3816	GLTP	Viridiplantae	Streptophyta	Dicots	Fabales	Fabaceae	Abrus	Abrus precatorius
XP_027338824.1	Abrus precatorius	3816	GLTP	Viridiplantae	Streptophyta	Dicots	Fabales	Fabaceae	Abrus	Abrus precatorius
XP_027338732.1	Abrus precatorius	3816	GLTP	Viridiplantae	Streptophyta	Dicots	Fabales	Fabaceae	Abrus	Abrus precatorius
XP_020995690.1	Arachis duranensis	130453	GLTP	Viridiplantae	Streptophyta	Dicots	Fabales	Fabaceae	Arachis	Arachis duranensis
XP_015959241.1	Arachis duranensis	130453	GLTP	Viridiplantae	Streptophyta	Dicots	Fabales	Fabaceae	Arachis	Arachis duranensis
XP_025646283.1	Arachis hypogaea	3818	GLTP	Viridiplantae	Streptophyta	Dicots	Fabales	Fabaceae	Arachis	Arachis hypogaea
XP_025646282.1	Arachis hypogaea	3818	GLTP	Viridiplantae	Streptophyta	Dicots	Fabales	Fabaceae	Arachis	Arachis hypogaea
RYR12346.1	Arachis hypogaea	3818	GLTP	Viridiplantae	Streptophyta	Dicots	Fabales	Fabaceae	Arachis	Arachis hypogaea
RYQ79163.1	Arachis hypogaea	3818	GLTP	Viridiplantae	Streptophyta	Dicots	Fabales	Fabaceae	Arachis	Arachis hypogaea
XP_020976391.1	Arachis ipaensis	130454	GLTP	Viridiplantae	Streptophyta	Dicots	Fabales	Fabaceae	Arachis	Arachis ipaensis
XP_016197708.1	Arachis ipaensis	130454	GLTP	Viridiplantae	Streptophyta	Dicots	Fabales	Fabaceae	Arachis	Arachis ipaensis
XP_020203396.1	Cajanus cajan	3821	GLTP	Viridiplantae	Streptophyta	Dicots	Fabales	Fabaceae	Cajanus	Cajanus cajan
XP_004486475.1	Cicer arietinum	3827	GLTP	Viridiplantae	Streptophyta	Dicots	Fabales	Fabaceae	Cicer	Cicer arietinum
XP_004486446.1	Cicer arietinum	3827	GLTP	Viridiplantae	Streptophyta	Dicots	Fabales	Fabaceae	Cicer	Cicer arietinum
XP_006586625.1	Glycine max	3847	GLTP	Viridiplantae	Streptophyta	Dicots	Fabales	Fabaceae	Glycine	Glycine max
NP_001235593.1	Glycine max	3847	GLTP	Viridiplantae	Streptophyta	Dicots	Fabales	Fabaceae	Glycine	Glycine max
NP_001235508.2	Glycine max	3847	GLTP	Viridiplantae	Streptophyta	Dicots	Fabales	Fabaceae	Glycine	Glycine max
KRH36761.1	Glycine max	3847	GLTP	Viridiplantae	Streptophyta	Dicots	Fabales	Fabaceae	Glycine	Glycine max
KRH36759.1	Glycine max	3847	GLTP	Viridiplantae	Streptophyta	Dicots	Fabales	Fabaceae	Glycine	Glycine max
KRH11759.1	Glycine max	3847	GLTP	Viridiplantae	Streptophyta	Dicots	Fabales	Fabaceae	Glycine	Glycine max
KRH11758.1	Glycine max	3847	GLTP	Viridiplantae	Streptophyta	Dicots	Fabales	Fabaceae	Glycine	Glycine max
AIU50576.1	Glycine max	3847	GLTP	Viridiplantae	Streptophyta	Dicots	Fabales	Fabaceae	Glycine	Glycine max
ACU13475.1	Glycine max	3847	GLTP	Viridiplantae	Streptophyta	Dicots	Fabales	Fabaceae	Glycine	Glycine max
XP_028248250.1	Glycine soja	3848	GLTP	Viridiplantae	Streptophyta	Dicots	Fabales	Fabaceae	Glycine	Glycine soja
XP_028248249.1	Glycine soja	3848	GLTP	Viridiplantae	Streptophyta	Dicots	Fabales	Fabaceae	Glycine	Glycine soja
XP_028202096.1	Glycine soja	3848	GLTP	Viridiplantae	Streptophyta	Dicots	Fabales	Fabaceae	Glycine	Glycine soja
RZB90249.1	Glycine soja	3848	GLTP	Viridiplantae	Streptophyta	Dicots	Fabales	Fabaceae	Glycine	Glycine soja
RZB90248.1	Glycine soja	3848	GLTP	Viridiplantae	Streptophyta	Dicots	Fabales	Fabaceae	Glycine	Glycine soja
RZB64362.1	Glycine soja	3848	GLTP	Viridiplantae	Streptophyta	Dicots	Fabales	Fabaceae	Glycine	Glycine soja
KHN22984.1	Glycine soja	3848	GLTP	Viridiplantae	Streptophyta	Dicots	Fabales	Fabaceae	Glycine	Glycine soja
KHN19198.1	Glycine soja	3848	GLTP	Viridiplantae	Streptophyta	Dicots	Fabales	Fabaceae	Glycine	Glycine soja
AFK48156.1	Lotus japonicus	34305	GLTP	Viridiplantae	Streptophyta	Dicots	Fabales	Fabaceae	Lotus	Lotus japonicus
XP_019440102.1	Lupinus angustifolius	3871	GLTP	Viridiplantae	Streptophyta	Dicots	Fabales	Fabaceae	Lupinus	Lupinus angustifolius
XP_019426040.1	Lupinus angustifolius	3871	GLTP	Viridiplantae	Streptophyta	Dicots	Fabales	Fabaceae	Lupinus	Lupinus angustifolius
OIV91909.1	Lupinus angustifolius	3871	GLTP	Viridiplantae	Streptophyta	Dicots	Fabales	Fabaceae	Lupinus	Lupinus angustifolius
XP_013463001.1	Medicago truncatula	3880	GLTP	Viridiplantae	Streptophyta	Dicots	Fabales	Fabaceae	Medicago	Medicago truncatula
XP_003594554.1	Medicago truncatula	3880	GLTP	Viridiplantae	Streptophyta	Dicots	Fabales	Fabaceae	Medicago	Medicago truncatula
RHN72835.1	Medicago truncatula	3880	GLTP	Viridiplantae	Streptophyta	Dicots	Fabales	Fabaceae	Medicago	Medicago truncatula
AIU50586.1	Medicago truncatula	3880	GLTP	Viridiplantae	Streptophyta	Dicots	Fabales	Fabaceae	Medicago	Medicago truncatula
RDX63323.1	Mucuna pruriens	157652	GLTP	Viridiplantae	Streptophyta	Dicots	Fabales	Fabaceae	Mucuna	Mucuna pruriens
XP_007147505.1	Phaseolus vulgaris	3885	GLTP	Viridiplantae	Streptophyta	Dicots	Fabales	Fabaceae	Phaseolus	Phaseolus vulgaris
AIU50596.1	Phaseolus vulgaris	3885	GLTP	Viridiplantae	Streptophyta	Dicots	Fabales	Fabaceae	Phaseolus	Phaseolus vulgaris
XP_028759358.1	Prosopis alba	207710	GLTP	Viridiplantae	Streptophyta	Dicots	Fabales	Fabaceae	Prosopis	Prosopis alba
TKY72359.1	Spatholobus suberectus	455371	GLTP	Viridiplantae	Streptophyta	Dicots	Fabales	Fabaceae	Spatholobus	Spatholobus suberectus
MCI29266.1	Trifolium medium	97028	GLTP	Viridiplantae	Streptophyta	Dicots	Fabales	Fabaceae	Trifolium	Trifolium medium
MCI03379.1	Trifolium medium	97028	GLTP	Viridiplantae	Streptophyta	Dicots	Fabales	Fabaceae	Trifolium	Trifolium medium
PNY11851.1	Trifolium pratense	57577	GLTP	Viridiplantae	Streptophyta	Dicots	Fabales	Fabaceae	Trifolium	Trifolium pratense
PNX95531.1	Trifolium pratense	57577	GLTP	Viridiplantae	Streptophyta	Dicots	Fabales	Fabaceae	Trifolium	Trifolium pratense
PNX63069.1	Trifolium pratense	57577	GLTP	Viridiplantae	Streptophyta	Dicots	Fabales	Fabaceae	Trifolium	Trifolium pratense
GAU47320.1	Trifolium subterraneum	3900	GLTP	Viridiplantae	Streptophyta	Dicots	Fabales	Fabaceae	Trifolium	Trifolium subterraneum
GAU12503.1	Trifolium subterraneum	3900	GLTP	Viridiplantae	Streptophyta	Dicots	Fabales	Fabaceae	Trifolium	Trifolium subterraneum
XP_017434131.1	Vigna angularis	3914	GLTP	Viridiplantae	Streptophyta	Dicots	Fabales	Fabaceae	Vigna	Vigna angularis
XP_017434130.1	Vigna angularis	3914	GLTP	Viridiplantae	Streptophyta	Dicots	Fabales	Fabaceae	Vigna	Vigna angularis
XP_014517070.1	Vigna radiata var. radiata	3916	GLTP	Viridiplantae	Streptophyta	Dicots	Fabales	Fabaceae	Vigna	Vigna radiata
XP_027933663.1	Vigna unguiculata	3917	GLTP	Viridiplantae	Streptophyta	Dicots	Fabales	Fabaceae	Vigna	Vigna unguiculata
XP_027933662.1	Vigna unguiculata	3917	GLTP	Viridiplantae	Streptophyta	Dicots	Fabales	Fabaceae	Vigna	Vigna unguiculata
XP_023924337.1	Quercus suber	58331	GLTP	Viridiplantae	Streptophyta	Dicots	Fagales	Fagaceae	Quercus	Quercus suber
XP_023913327.1	Quercus suber	58331	GLTP	Viridiplantae	Streptophyta	Dicots	Fagales	Fagaceae	Quercus	Quercus suber
XP_018828104.1	Juglans regia	51240	GLTP	Viridiplantae	Streptophyta	Dicots	Fagales	Juglandaceae	Juglans	Juglans regia
XP_018828103.1	Juglans regia	51240	GLTP	Viridiplantae	Streptophyta	Dicots	Fagales	Juglandaceae	Juglans	Juglans regia
XP_018810165.1	Juglans regia	51240	GLTP	Viridiplantae	Streptophyta	Dicots	Fagales	Juglandaceae	Juglans	Juglans regia
XP_024397072.1	Physcomitrella patens	3218	GLTP	Viridiplantae	Streptophyta	Bryopsida	Funariales	Funariaceae	Physcomitrella	Physcomitrella patens
XP_027087908.1	Coffea arabica	13443	GLTP	Viridiplantae	Streptophyta	Dicots	Gentianales	Rubiaceae	Coffea	Coffea arabica
XP_027085900.1	Coffea arabica	13443	GLTP	Viridiplantae	Streptophyta	Dicots	Gentianales	Rubiaceae	Coffea	Coffea arabica
AIU50609.1	Ginkgo biloba	3311	GLTP	Viridiplantae	Streptophyta	Reptilia	Ginkgoales	Ginkgoaceae	Ginkgo	Ginkgo biloba
GAQ85540.1	Klebsormidium nitens	105231	GLTP	Viridiplantae	Streptophyta	Klebsormidiophyceae	Klebsormidiales	Klebsormidiaceae	Klebsormidium	Klebsormidium nitens
PIN21002.1	Handroanthus impetiginosus	429701	GLTP	Viridiplantae	Streptophyta	Dicots	Lamiales	Bignoniaceae	Handroanthus	Handroanthus impetiginosus
PIN13704.1	Handroanthus impetiginosus	429701	GLTP	Viridiplantae	Streptophyta	Dicots	Lamiales	Bignoniaceae	Handroanthus	Handroanthus impetiginosus
KZV46197.1	Dorcoceras hygrometricum	472368	GLTP	Viridiplantae	Streptophyta	Dicots	Lamiales	Gesneriaceae	Dorcoceras	Dorcoceras hygrometricum
TEY92095.1	Salvia splendens	180675	GLTP	Viridiplantae	Streptophyta	Dicots	Lamiales	Lamiaceae	Salvia	Salvia splendens
TEY70675.1	Salvia splendens	180675	GLTP	Viridiplantae	Streptophyta	Dicots	Lamiales	Lamiaceae	Salvia	Salvia splendens
TEY29430.1	Salvia splendens	180675	GLTP	Viridiplantae	Streptophyta	Dicots	Lamiales	Lamiaceae	Salvia	Salvia splendens
TEY11766.1	Salvia splendens	180675	GLTP	Viridiplantae	Streptophyta	Dicots	Lamiales	Lamiaceae	Salvia	Salvia splendens
EPS73794.1	Genlisea aurea	192259	GLTP	Viridiplantae	Streptophyta	Dicots	Lamiales	Lentibulariaceae	Genlisea	Genlisea aurea
XP_022849441.1	Olea europaea var. sylvestris	158386	GLTP	Viridiplantae	Streptophyta	Dicots	Lamiales	Oleaceae	Olea	Olea europaea
XP_011091362.1	Sesamum indicum	4182	GLTP	Viridiplantae	Streptophyta	Dicots	Lamiales	Pedaliaceae	Sesamum	Sesamum indicum
XP_012829026.1	Erythranthe guttata	4155	GLTP	Viridiplantae	Streptophyta	Dicots	Lamiales	Phrymaceae	Erythranthe	Erythranthe guttata
AIU50589.1	Erythranthe guttata	4155	GLTP	Viridiplantae	Streptophyta	Dicots	Lamiales	Phrymaceae	Erythranthe	Erythranthe guttata
AIU50582.1	Chimonanthus praecox	13419	GLTP	Viridiplantae	Streptophyta	Reptilia	Laurales	Calycanthaceae	Chimonanthus	Chimonanthus praecox
RWR85826.1	Cinnamomum micranthum f. kanehirae	337451	GLTP	Viridiplantae	Streptophyta	Dicots	Laurales	Lauraceae	Cinnamomum	Cinnamomum micranthum
AIU50607.1	Cinnamomum camphora	13429	GLTP	Viridiplantae	Streptophyta	Reptilia	Laurales	Lauraceae	Cinnamomum	Cinnamomum camphora
AIU50591.1	Persea americana	3435	GLTP	Viridiplantae	Streptophyta	Reptilia	Laurales	Lauraceae	Persea	Persea americana
AIU50563.1	Lilium brownii	82312	GLTP	Viridiplantae	Streptophyta	Monocots	Liliales	Liliaceae	Lilium	Lilium brownii
AIU50564.1	Magnolia denudata	85856	GLTP	Viridiplantae	Streptophyta	-	Magnoliales	Magnoliaceae	Magnolia	Magnolia denudata
XP_021649930.1	Hevea brasiliensis	3981	GLTP	Viridiplantae	Streptophyta	Dicots	Malpighiales	Euphorbiaceae	Hevea	Hevea brasiliensis
XP_012075638.1	Jatropha curcas	180498	GLTP	Viridiplantae	Streptophyta	Dicots	Malpighiales	Euphorbiaceae	Jatropha	Jatropha curcas
XP_021633951.1	Manihot esculenta	3983	GLTP	Viridiplantae	Streptophyta	Dicots	Malpighiales	Euphorbiaceae	Manihot	Manihot esculenta
AIU50588.1	Manihot esculenta	3983	GLTP	Viridiplantae	Streptophyta	Dicots	Malpighiales	Euphorbiaceae	Manihot	Manihot esculenta
XP_002533030.1	Ricinus communis	3988	GLTP	Viridiplantae	Streptophyta	Dicots	Malpighiales	Euphorbiaceae	Ricinus	Ricinus communis
AIU50598.1	Ricinus communis	3988	GLTP	Viridiplantae	Streptophyta	Dicots	Malpighiales	Euphorbiaceae	Ricinus	Ricinus communis
TKS09965.1	Populus alba	43335	GLTP	Viridiplantae	Streptophyta	Dicots	Malpighiales	Salicaceae	Populus	Populus alba
TKR84090.1	Populus alba	43335	GLTP	Viridiplantae	Streptophyta	Dicots	Malpighiales	Salicaceae	Populus	Populus alba
XP_011048042.1	Populus euphratica	75702	GLTP	Viridiplantae	Streptophyta	Dicots	Malpighiales	Salicaceae	Populus	Populus euphratica
XP_011033328.1	Populus euphratica	75702	GLTP	Viridiplantae	Streptophyta	Dicots	Malpighiales	Salicaceae	Populus	Populus euphratica
XP_006373781.1	Populus trichocarpa	3694	GLTP	Viridiplantae	Streptophyta	Dicots	Malpighiales	Salicaceae	Populus	Populus trichocarpa
XP_002308949.1	Populus trichocarpa	3694	GLTP	Viridiplantae	Streptophyta	Dicots	Malpighiales	Salicaceae	Populus	Populus trichocarpa
PNS98024.1	Populus trichocarpa	3694	GLTP	Viridiplantae	Streptophyta	Dicots	Malpighiales	Salicaceae	Populus	Populus trichocarpa
AIU50593.1	Populus trichocarpa	3694	GLTP	Viridiplantae	Streptophyta	Dicots	Malpighiales	Salicaceae	Populus	Populus trichocarpa
OMO75093.1	Corchorus capsularis	210143	GLTP	Viridiplantae	Streptophyta	Dicots	Malvales	Malvaceae	Corchorus	Corchorus capsularis
OMO92314.1	Corchorus olitorius	93759	GLTP	Viridiplantae	Streptophyta	Dicots	Malvales	Malvaceae	Corchorus	Corchorus olitorius
XP_022762691.1	Durio zibethinus	66656	GLTP	Viridiplantae	Streptophyta	Dicots	Malvales	Malvaceae	Durio	Durio zibethinus
XP_016734577.1	Gossypium hirsutum	3635	GLTP	Viridiplantae	Streptophyta	Dicots	Malvales	Malvaceae	Gossypium	Gossypium hirsutum
XP_016715216.1	Gossypium hirsutum	3635	GLTP	Viridiplantae	Streptophyta	Dicots	Malvales	Malvaceae	Gossypium	Gossypium hirsutum
XP_012436535.1	Gossypium raimondii	29730	GLTP	Viridiplantae	Streptophyta	Dicots	Malvales	Malvaceae	Gossypium	Gossypium raimondii
KJB47905.1	Gossypium raimondii	29730	GLTP	Viridiplantae	Streptophyta	Dicots	Malvales	Malvaceae	Gossypium	Gossypium raimondii
AIU50571.1	Gossypium raimondii	29730	GLTP	Viridiplantae	Streptophyta	Dicots	Malvales	Malvaceae	Gossypium	Gossypium raimondii
XP_021286265.1	Herrania umbratica	108875	GLTP	Viridiplantae	Streptophyta	Dicots	Malvales	Malvaceae	Herrania	Herrania umbratica
XP_007041139.2	Theobroma cacao	3641	GLTP	Viridiplantae	Streptophyta	Dicots	Malvales	Malvaceae	Theobroma	Theobroma cacao
EOX96970.1	Theobroma cacao	3641	GLTP	Viridiplantae	Streptophyta	Dicots	Malvales	Malvaceae	Theobroma	Theobroma cacao
AIU50567.1	Theobroma cacao	3641	GLTP	Viridiplantae	Streptophyta	Dicots	Malvales	Malvaceae	Theobroma	Theobroma cacao
OAE25972.1	Marchantia polymorpha subsp. ruderalis	1480154	GLTP	Viridiplantae	Streptophyta	Marchantiopsida	Marchantiales	Marchantiaceae	Marchantia	Marchantia polymorpha
PKI59027.1	Punica granatum	22663	GLTP	Viridiplantae	Streptophyta	Dicots	Myrtales	Lythraceae	Punica	Punica granatum
OWM71296.1	Punica granatum	22663	GLTP	Viridiplantae	Streptophyta	Dicots	Myrtales	Lythraceae	Punica	Punica granatum
XP_010065646.1	Eucalyptus grandis	71139	GLTP	Viridiplantae	Streptophyta	Dicots	Myrtales	Myrtaceae	Eucalyptus	Eucalyptus grandis
XP_010056975.1	Eucalyptus grandis	71139	GLTP	Viridiplantae	Streptophyta	Dicots	Myrtales	Myrtaceae	Eucalyptus	Eucalyptus grandis
AIU50575.1	Eucalyptus grandis	71139	GLTP	Viridiplantae	Streptophyta	Dicots	Myrtales	Myrtaceae	Eucalyptus	Eucalyptus grandis
AIU50614.1	Cabomba caroliniana	4426	GLTP	Viridiplantae	Streptophyta	-	Nymphaeales	Cabombaceae	Cabomba	Cabomba caroliniana
AIU50590.1	Nuphar advena	77108	GLTP	Viridiplantae	Streptophyta	-	Nymphaeales	Nymphaeaceae	Nuphar	Nuphar advena
GAV91404.1	Cephalotus follicularis	3775	GLTP	Viridiplantae	Streptophyta	Dicots	Oxalidales	Cephalotaceae	Cephalotus	Cephalotus follicularis
AIU50583.1	Pandanus utilis	101712	GLTP	Viridiplantae	Streptophyta	Monocots	Pandanales	Pandanaceae	Pandanus	Pandanus utilis
ADE77180.1	Picea sitchensis	3332	GLTP	Viridiplantae	Streptophyta	Pinidae	Pinales	Pinaceae	Picea	Picea sitchensis
AIU50585.1	Aristolochia tagala	158573	GLTP	Viridiplantae	Streptophyta	-	Piperales	Aristolochiaceae	Aristolochia	Aristolochia tagala
AIU50610.1	Houttuynia cordata	16752	GLTP	Viridiplantae	Streptophyta	-	Piperales	Saururaceae	Houttuynia	Houttuynia cordata
XP_020095323.1	Ananas comosus	4615	GLTP	Viridiplantae	Streptophyta	Monocots	Poales	Bromeliaceae	Ananas	Ananas comosus
XP_020080411.1	Ananas comosus	4615	GLTP	Viridiplantae	Streptophyta	Monocots	Poales	Bromeliaceae	Ananas	Ananas comosus
OAY85106.1	Ananas comosus	4615	GLTP	Viridiplantae	Streptophyta	Monocots	Poales	Bromeliaceae	Ananas	Ananas comosus
AIU50595.1	Panicum virgatum	38727	GLTP	Viridiplantae	Streptophyta	Monocots	Poales	Poaceae	Panicum	Panicum virgatum
XP_020147331.1	Aegilops tauschii subsp. tauschii	169297	GLTP	Viridiplantae	Streptophyta	Monocots	Poales	Poaceae	Aegilops	Aegilops tauschii
XP_014753013.1	Brachypodium distachyon	15368	GLTP	Viridiplantae	Streptophyta	Monocots	Poales	Poaceae	Brachypodium	Brachypodium distachyon
OEL27036.1	Dichanthelium oligosanthes	888268	GLTP	Viridiplantae	Streptophyta	Monocots	Poales	Poaceae	Dichanthelium	Dichanthelium oligosanthes
OEL23451.1	Dichanthelium oligosanthes	888268	GLTP	Viridiplantae	Streptophyta	Monocots	Poales	Poaceae	Dichanthelium	Dichanthelium oligosanthes
BAJ94246.1	Hordeum vulgare subsp. vulgare	112509	GLTP	Viridiplantae	Streptophyta	Monocots	Poales	Poaceae	Hordeum	Hordeum vulgare
XP_006650688.1	Oryza brachyantha	4533	GLTP	Viridiplantae	Streptophyta	Monocots	Poales	Poaceae	Oryza	Oryza brachyantha
XP_015628156.1	Oryza sativa Japonica Group	39947	GLTP	Viridiplantae	Streptophyta	Monocots	Poales	Poaceae	Oryza	Oryza sativa
EAZ43625.1	Oryza sativa Japonica Group	39947	GLTP	Viridiplantae	Streptophyta	Monocots	Poales	Poaceae	Oryza	Oryza sativa
BAD09071.1	Oryza sativa Japonica Group	39947	GLTP	Viridiplantae	Streptophyta	Monocots	Poales	Poaceae	Oryza	Oryza sativa
XP_025793538.1	Panicum hallii	206008	GLTP	Viridiplantae	Streptophyta	Monocots	Poales	Poaceae	Panicum	Panicum hallii
PVH31116.1	Panicum hallii	206008	GLTP	Viridiplantae	Streptophyta	Monocots	Poales	Poaceae	Panicum	Panicum hallii
PUZ36704.1	Panicum hallii var. hallii	1504633	GLTP	Viridiplantae	Streptophyta	Monocots	Poales	Poaceae	Panicum	Panicum hallii
RLN18041.1	Panicum miliaceum	4540	GLTP	Viridiplantae	Streptophyta	Monocots	Poales	Poaceae	Panicum	Panicum miliaceum
RLM92755.1	Panicum miliaceum	4540	GLTP	Viridiplantae	Streptophyta	Monocots	Poales	Poaceae	Panicum	Panicum miliaceum
XP_004981525.1	Setaria italica	4555	GLTP	Viridiplantae	Streptophyta	Monocots	Poales	Poaceae	Setaria	Setaria italica
RCV40566.1	Setaria italica	4555	GLTP	Viridiplantae	Streptophyta	Monocots	Poales	Poaceae	Setaria	Setaria italica
AIU50601.1	Setaria italica	4555	GLTP	Viridiplantae	Streptophyta	Monocots	Poales	Poaceae	Setaria	Setaria italica
TKV90980.1	Setaria viridis	4556	GLTP	Viridiplantae	Streptophyta	Monocots	Poales	Poaceae	Setaria	Setaria viridis
XP_002463782.1	Sorghum bicolor	4558	GLTP	Viridiplantae	Streptophyta	Monocots	Poales	Poaceae	Sorghum	Sorghum bicolor
AIU50603.1	Sorghum bicolor	4558	GLTP	Viridiplantae	Streptophyta	Monocots	Poales	Poaceae	Sorghum	Sorghum bicolor
EMS45773.1	Triticum urartu	4572	GLTP	Viridiplantae	Streptophyta	Monocots	Poales	Poaceae	Triticum	Triticum urartu
PWZ52503.1	Zea mays	4577	GLTP	Viridiplantae	Streptophyta	Monocots	Poales	Poaceae	Zea	Zea mays
ONM10001.1	Zea mays	4577	GLTP	Viridiplantae	Streptophyta	Monocots	Poales	Poaceae	Zea	Zea mays
ONM10000.1	Zea mays	4577	GLTP	Viridiplantae	Streptophyta	Monocots	Poales	Poaceae	Zea	Zea mays
NP_001143358.1	Zea mays	4577	GLTP	Viridiplantae	Streptophyta	Monocots	Poales	Poaceae	Zea	Zea mays
AIU50611.1	Zea mays	4577	GLTP	Viridiplantae	Streptophyta	Monocots	Poales	Poaceae	Zea	Zea mays
ACF88001.1	Zea mays	4577	GLTP	Viridiplantae	Streptophyta	Monocots	Poales	Poaceae	Zea	Zea mays
XP_010241182.1	Nelumbo nucifera	4432	GLTP	Viridiplantae	Streptophyta	Dicots	Proteales	Nelumbonaceae	Nelumbo	Nelumbo nucifera
XP_010241181.1	Nelumbo nucifera	4432	GLTP	Viridiplantae	Streptophyta	Dicots	Proteales	Nelumbonaceae	Nelumbo	Nelumbo nucifera
AIU50608.1	Platanus x hispanica	140101	GLTP	Viridiplantae	Streptophyta	-	Proteales	Platanaceae	Platanus	Platanus x hispanica
OVA01170.1	Macleaya cordata	56857	GLTP	Viridiplantae	Streptophyta	Dicots	Ranunculales	Papaveraceae	Macleaya	Macleaya cordata
XP_026445266.1	Papaver somniferum	3469	GLTP	Viridiplantae	Streptophyta	Dicots	Ranunculales	Papaveraceae	Papaver	Papaver somniferum
XP_026445262.1	Papaver somniferum	3469	GLTP	Viridiplantae	Streptophyta	Dicots	Ranunculales	Papaveraceae	Papaver	Papaver somniferum
XP_026440780.1	Papaver somniferum	3469	GLTP	Viridiplantae	Streptophyta	Dicots	Ranunculales	Papaveraceae	Papaver	Papaver somniferum
XP_026440772.1	Papaver somniferum	3469	GLTP	Viridiplantae	Streptophyta	Dicots	Ranunculales	Papaveraceae	Papaver	Papaver somniferum
XP_026429697.1	Papaver somniferum	3469	GLTP	Viridiplantae	Streptophyta	Dicots	Ranunculales	Papaveraceae	Papaver	Papaver somniferum
XP_026397081.1	Papaver somniferum	3469	GLTP	Viridiplantae	Streptophyta	Dicots	Ranunculales	Papaveraceae	Papaver	Papaver somniferum
XP_026395449.1	Papaver somniferum	3469	GLTP	Viridiplantae	Streptophyta	Dicots	Ranunculales	Papaveraceae	Papaver	Papaver somniferum
XP_026390837.1	Papaver somniferum	3469	GLTP	Viridiplantae	Streptophyta	Dicots	Ranunculales	Papaveraceae	Papaver	Papaver somniferum
XP_026383839.1	Papaver somniferum	3469	GLTP	Viridiplantae	Streptophyta	Dicots	Ranunculales	Papaveraceae	Papaver	Papaver somniferum
RZC94244.1	Papaver somniferum	3469	GLTP	Viridiplantae	Streptophyta	Dicots	Ranunculales	Papaveraceae	Papaver	Papaver somniferum
RZC67848.1	Papaver somniferum	3469	GLTP	Viridiplantae	Streptophyta	Dicots	Ranunculales	Papaveraceae	Papaver	Papaver somniferum
RZC43641.1	Papaver somniferum	3469	GLTP	Viridiplantae	Streptophyta	Dicots	Ranunculales	Papaveraceae	Papaver	Papaver somniferum
PIA41706.1	Aquilegia coerulea	218851	GLTP	Viridiplantae	Streptophyta	Dicots	Ranunculales	Ranunculaceae	Aquilegia	Aquilegia coerulea
PIA41705.1	Aquilegia coerulea	218851	GLTP	Viridiplantae	Streptophyta	Dicots	Ranunculales	Ranunculaceae	Aquilegia	Aquilegia coerulea
PIA31050.1	Aquilegia coerulea	218851	GLTP	Viridiplantae	Streptophyta	Dicots	Ranunculales	Ranunculaceae	Aquilegia	Aquilegia coerulea
PIA31049.1	Aquilegia coerulea	218851	GLTP	Viridiplantae	Streptophyta	Dicots	Ranunculales	Ranunculaceae	Aquilegia	Aquilegia coerulea
PIA31048.1	Aquilegia coerulea	218851	GLTP	Viridiplantae	Streptophyta	Dicots	Ranunculales	Ranunculaceae	Aquilegia	Aquilegia coerulea
PIA31047.1	Aquilegia coerulea	218851	GLTP	Viridiplantae	Streptophyta	Dicots	Ranunculales	Ranunculaceae	Aquilegia	Aquilegia coerulea
AIU50560.1	Aquilegia coerulea	218851	GLTP	Viridiplantae	Streptophyta	Dicots	Ranunculales	Ranunculaceae	Aquilegia	Aquilegia coerulea
PON72526.1	Parasponia andersonii	3476	GLTP	Viridiplantae	Streptophyta	Dicots	Rosales	Cannabaceae	Parasponia	Parasponia andersonii
PON54759.1	Parasponia andersonii	3476	GLTP	Viridiplantae	Streptophyta	Dicots	Rosales	Cannabaceae	Parasponia	Parasponia andersonii
POO00961.1	Trema orientale	63057	GLTP	Viridiplantae	Streptophyta	Dicots	Rosales	Cannabaceae	Trema	Trema orientale
POO00193.1	Trema orientale	63057	GLTP	Viridiplantae	Streptophyta	Dicots	Rosales	Cannabaceae	Trema	Trema orientale
PON98523.1	Trema orientale	63057	GLTP	Viridiplantae	Streptophyta	Dicots	Rosales	Cannabaceae	Trema	Trema orientale
XP_024031077.1	Morus notabilis	981085	GLTP	Viridiplantae	Streptophyta	Dicots	Rosales	Moraceae	Morus	Morus notabilis
XP_024018933.1	Morus notabilis	981085	GLTP	Viridiplantae	Streptophyta	Dicots	Rosales	Moraceae	Morus	Morus notabilis
XP_024018932.1	Morus notabilis	981085	GLTP	Viridiplantae	Streptophyta	Dicots	Rosales	Moraceae	Morus	Morus notabilis
XP_010110756.2	Morus notabilis	981085	GLTP	Viridiplantae	Streptophyta	Dicots	Rosales	Moraceae	Morus	Morus notabilis
XP_010089847.1	Morus notabilis	981085	GLTP	Viridiplantae	Streptophyta	Dicots	Rosales	Moraceae	Morus	Morus notabilis
EXC28021.1	Morus notabilis	981085	GLTP	Viridiplantae	Streptophyta	Dicots	Rosales	Moraceae	Morus	Morus notabilis
EXC10677.1	Morus notabilis	981085	GLTP	Viridiplantae	Streptophyta	Dicots	Rosales	Moraceae	Morus	Morus notabilis
EXB51972.1	Morus notabilis	981085	GLTP	Viridiplantae	Streptophyta	Dicots	Rosales	Moraceae	Morus	Morus notabilis
XP_015883372.1	Ziziphus jujuba	326968	GLTP	Viridiplantae	Streptophyta	Dicots	Rosales	Rhamnaceae	Ziziphus	Ziziphus jujuba
XP_004293995.1	Fragaria vesca subsp. vesca	101020	GLTP	Viridiplantae	Streptophyta	Dicots	Rosales	Rosaceae	Fragaria	Fragaria vesca
XP_028944063.1	Malus domestica	3750	GLTP	Viridiplantae	Streptophyta	Dicots	Rosales	Rosaceae	Malus	Malus domestica
XP_028943700.1	Malus domestica	3750	GLTP	Viridiplantae	Streptophyta	Dicots	Rosales	Rosaceae	Malus	Malus domestica
XP_028943699.1	Malus domestica	3750	GLTP	Viridiplantae	Streptophyta	Dicots	Rosales	Rosaceae	Malus	Malus domestica
XP_028943698.1	Malus domestica	3750	GLTP	Viridiplantae	Streptophyta	Dicots	Rosales	Rosaceae	Malus	Malus domestica
XP_017181586.2	Malus domestica	3750	GLTP	Viridiplantae	Streptophyta	Dicots	Rosales	Rosaceae	Malus	Malus domestica
XP_008384478.1	Malus domestica	3750	GLTP	Viridiplantae	Streptophyta	Dicots	Rosales	Rosaceae	Malus	Malus domestica
XP_008384472.2	Malus domestica	3750	GLTP	Viridiplantae	Streptophyta	Dicots	Rosales	Rosaceae	Malus	Malus domestica
XP_008383410.1	Malus domestica	3750	GLTP	Viridiplantae	Streptophyta	Dicots	Rosales	Rosaceae	Malus	Malus domestica
XP_008372214.1	Malus domestica	3750	GLTP	Viridiplantae	Streptophyta	Dicots	Rosales	Rosaceae	Malus	Malus domestica
RXH98894.1	Malus domestica	3750	GLTP	Viridiplantae	Streptophyta	Dicots	Rosales	Rosaceae	Malus	Malus domestica
RXH85247.1	Malus domestica	3750	GLTP	Viridiplantae	Streptophyta	Dicots	Rosales	Rosaceae	Malus	Malus domestica
RXH85243.1	Malus domestica	3750	GLTP	Viridiplantae	Streptophyta	Dicots	Rosales	Rosaceae	Malus	Malus domestica
RXH84859.1	Malus domestica	3750	GLTP	Viridiplantae	Streptophyta	Dicots	Rosales	Rosaceae	Malus	Malus domestica
XP_021812431.1	Prunus avium	42229	GLTP	Viridiplantae	Streptophyta	Dicots	Rosales	Rosaceae	Prunus	Prunus avium
XP_008225586.1	Prunus mume	102107	GLTP	Viridiplantae	Streptophyta	Dicots	Rosales	Rosaceae	Prunus	Prunus mume
XP_020418586.1	Prunus persica	3760	GLTP	Viridiplantae	Streptophyta	Dicots	Rosales	Rosaceae	Prunus	Prunus persica
ONI11141.1	Prunus persica	3760	GLTP	Viridiplantae	Streptophyta	Dicots	Rosales	Rosaceae	Prunus	Prunus persica
AIU50594.1	Prunus persica	3760	GLTP	Viridiplantae	Streptophyta	Dicots	Rosales	Rosaceae	Prunus	Prunus persica
PQQ21217.1	Prunus yedoensis var. nudiflora	2094558	GLTP	Viridiplantae	Streptophyta	Dicots	Rosales	Rosaceae	Prunus	Prunus yedoensis
XP_009364754.1	Pyrus x bretschneideri	225117	GLTP	Viridiplantae	Streptophyta	Dicots	Rosales	Rosaceae	Pyrus	Pyrus x bretschneideri
XP_009364750.1	Pyrus x bretschneideri	225117	GLTP	Viridiplantae	Streptophyta	Dicots	Rosales	Rosaceae	Pyrus	Pyrus x bretschneideri
XP_009364747.1	Pyrus x bretschneideri	225117	GLTP	Viridiplantae	Streptophyta	Dicots	Rosales	Rosaceae	Pyrus	Pyrus x bretschneideri
XP_009362245.1	Pyrus x bretschneideri	225117	GLTP	Viridiplantae	Streptophyta	Dicots	Rosales	Rosaceae	Pyrus	Pyrus x bretschneideri
XP_009354471.1	Pyrus x bretschneideri	225117	GLTP	Viridiplantae	Streptophyta	Dicots	Rosales	Rosaceae	Pyrus	Pyrus x bretschneideri
XP_009349194.1	Pyrus x bretschneideri	225117	GLTP	Viridiplantae	Streptophyta	Dicots	Rosales	Rosaceae	Pyrus	Pyrus x bretschneideri
XP_009349193.1	Pyrus x bretschneideri	225117	GLTP	Viridiplantae	Streptophyta	Dicots	Rosales	Rosaceae	Pyrus	Pyrus x bretschneideri
XP_009349192.1	Pyrus x bretschneideri	225117	GLTP	Viridiplantae	Streptophyta	Dicots	Rosales	Rosaceae	Pyrus	Pyrus x bretschneideri
XP_009344400.1	Pyrus x bretschneideri	225117	GLTP	Viridiplantae	Streptophyta	Dicots	Rosales	Rosaceae	Pyrus	Pyrus x bretschneideri
XP_024198764.1	Rosa chinensis	74649	GLTP	Viridiplantae	Streptophyta	Dicots	Rosales	Rosaceae	Rosa	Rosa chinensis
XP_006448932.1	Citrus clementina	85681	GLTP	Viridiplantae	Streptophyta	Dicots	Sapindales	Rutaceae	Citrus	Citrus clementina
XP_006448928.1	Citrus clementina	85681	GLTP	Viridiplantae	Streptophyta	Dicots	Sapindales	Rutaceae	Citrus	Citrus clementina
ESR62171.1	Citrus clementina	85681	GLTP	Viridiplantae	Streptophyta	Dicots	Sapindales	Rutaceae	Citrus	Citrus clementina
ESR62170.1	Citrus clementina	85681	GLTP	Viridiplantae	Streptophyta	Dicots	Sapindales	Rutaceae	Citrus	Citrus clementina
ESR62169.1	Citrus clementina	85681	GLTP	Viridiplantae	Streptophyta	Dicots	Sapindales	Rutaceae	Citrus	Citrus clementina
AIU50570.1	Citrus clementina	85681	GLTP	Viridiplantae	Streptophyta	Dicots	Sapindales	Rutaceae	Citrus	Citrus clementina
XP_006468288.1	Citrus sinensis	2711	GLTP	Viridiplantae	Streptophyta	Dicots	Sapindales	Rutaceae	Citrus	Citrus sinensis
XP_006468286.1	Citrus sinensis	2711	GLTP	Viridiplantae	Streptophyta	Dicots	Sapindales	Rutaceae	Citrus	Citrus sinensis
KDO75306.1	Citrus sinensis	2711	GLTP	Viridiplantae	Streptophyta	Dicots	Sapindales	Rutaceae	Citrus	Citrus sinensis
KDO75304.1	Citrus sinensis	2711	GLTP	Viridiplantae	Streptophyta	Dicots	Sapindales	Rutaceae	Citrus	Citrus sinensis
KDO75302.1	Citrus sinensis	2711	GLTP	Viridiplantae	Streptophyta	Dicots	Sapindales	Rutaceae	Citrus	Citrus sinensis
AIU50574.1	Citrus sinensis	2711	GLTP	Viridiplantae	Streptophyta	Dicots	Sapindales	Rutaceae	Citrus	Citrus sinensis
GAY33988.1	Citrus unshiu	55188	GLTP	Viridiplantae	Streptophyta	Dicots	Sapindales	Rutaceae	Citrus	Citrus unshiu
XP_002973744.2	Selaginella moellendorffii	88036	GLTP	Viridiplantae	Streptophyta	Lycopodiopsida	Selaginellales	Selaginellaceae	Selaginella	Selaginella moellendorffii
EFJ23422.1	Selaginella moellendorffii	88036	GLTP	Viridiplantae	Streptophyta	Lycopodiopsida	Selaginellales	Selaginellaceae	Selaginella	Selaginella moellendorffii
RAL49800.1	Cuscuta australis	267555	GLTP	Viridiplantae	Streptophyta	Dicots	Solanales	Convolvulaceae	Cuscuta	Cuscuta australis
XP_019169842.1	Ipomoea nil	35883	GLTP	Viridiplantae	Streptophyta	Dicots	Solanales	Convolvulaceae	Ipomoea	Ipomoea nil
XP_016559442.1	Capsicum annuum	4072	GLTP	Viridiplantae	Streptophyta	Dicots	Solanales	Solanaceae	Capsicum	Capsicum annuum
PHT90035.1	Capsicum annuum	4072	GLTP	Viridiplantae	Streptophyta	Dicots	Solanales	Solanaceae	Capsicum	Capsicum annuum
PHU25889.1	Capsicum chinense	80379	GLTP	Viridiplantae	Streptophyta	Dicots	Solanales	Solanaceae	Capsicum	Capsicum chinense
XP_019240756.1	Nicotiana attenuata	49451	GLTP	Viridiplantae	Streptophyta	Dicots	Solanales	Solanaceae	Nicotiana	Nicotiana attenuata
XP_009767452.1	Nicotiana sylvestris	4096	GLTP	Viridiplantae	Streptophyta	Dicots	Solanales	Solanaceae	Nicotiana	Nicotiana sylvestris
XP_009599051.1	Nicotiana tomentosiformis	4098	GLTP	Viridiplantae	Streptophyta	Dicots	Solanales	Solanaceae	Nicotiana	Nicotiana tomentosiformis
TMX01678.1	Solanum chilense	4083	GLTP	Viridiplantae	Streptophyta	Dicots	Solanales	Solanaceae	Solanum	Solanum chilense
XP_010316945.1	Solanum lycopersicum	4081	GLTP	Viridiplantae	Streptophyta	Dicots	Solanales	Solanaceae	Solanum	Solanum lycopersicum
XP_004233144.1	Solanum lycopersicum	4081	GLTP	Viridiplantae	Streptophyta	Dicots	Solanales	Solanaceae	Solanum	Solanum lycopersicum
AIU50602.1	Solanum lycopersicum	4081	GLTP	Viridiplantae	Streptophyta	Dicots	Solanales	Solanaceae	Solanum	Solanum lycopersicum
XP_015063691.1	Solanum pennellii	28526	GLTP	Viridiplantae	Streptophyta	Dicots	Solanales	Solanaceae	Solanum	Solanum pennellii
XP_015063690.1	Solanum pennellii	28526	GLTP	Viridiplantae	Streptophyta	Dicots	Solanales	Solanaceae	Solanum	Solanum pennellii
XP_015166635.1	Solanum tuberosum	4113	GLTP	Viridiplantae	Streptophyta	Dicots	Solanales	Solanaceae	Solanum	Solanum tuberosum
XP_006361538.2	Solanum tuberosum	4113	GLTP	Viridiplantae	Streptophyta	Dicots	Solanales	Solanaceae	Solanum	Solanum tuberosum
XP_006352990.1	Solanum tuberosum	4113	GLTP	Viridiplantae	Streptophyta	Dicots	Solanales	Solanaceae	Solanum	Solanum tuberosum
AIU50592.1	Solanum tuberosum	4113	GLTP	Viridiplantae	Streptophyta	Dicots	Solanales	Solanaceae	Solanum	Solanum tuberosum
PHT55657.1	Capsicum baccatum	33114	GLTP	Viridiplantae	Streptophyta	Dicots	Solanales	Solanaceae	Capsicum	Capsicum baccatum
PHT37498.1	Capsicum baccatum	33114	GLTP	Viridiplantae	Streptophyta	Dicots	Solanales	Solanaceae	Capsicum	Capsicum baccatum
XP_019078508.1	Vitis vinifera	29760	GLTP	Viridiplantae	Streptophyta	Dicots	Vitales	Vitaceae	Vitis	Vitis vinifera
XP_019078506.1	Vitis vinifera	29760	GLTP	Viridiplantae	Streptophyta	Dicots	Vitales	Vitaceae	Vitis	Vitis vinifera
XP_019078385.1	Vitis vinifera	29760	GLTP	Viridiplantae	Streptophyta	Dicots	Vitales	Vitaceae	Vitis	Vitis vinifera
XP_010656881.1	Vitis vinifera	29760	GLTP	Viridiplantae	Streptophyta	Dicots	Vitales	Vitaceae	Vitis	Vitis vinifera
XP_010655733.1	Vitis vinifera	29760	GLTP	Viridiplantae	Streptophyta	Dicots	Vitales	Vitaceae	Vitis	Vitis vinifera
XP_002281564.1	Vitis vinifera	29760	GLTP	Viridiplantae	Streptophyta	Dicots	Vitales	Vitaceae	Vitis	Vitis vinifera
XP_002263172.1	Vitis vinifera	29760	GLTP	Viridiplantae	Streptophyta	Dicots	Vitales	Vitaceae	Vitis	Vitis vinifera
XP_002262946.1	Vitis vinifera	29760	GLTP	Viridiplantae	Streptophyta	Dicots	Vitales	Vitaceae	Vitis	Vitis vinifera
XP_002262916.1	Vitis vinifera	29760	GLTP	Viridiplantae	Streptophyta	Dicots	Vitales	Vitaceae	Vitis	Vitis vinifera
RVX07740.1	Vitis vinifera	29760	GLTP	Viridiplantae	Streptophyta	Dicots	Vitales	Vitaceae	Vitis	Vitis vinifera
RVX07739.1	Vitis vinifera	29760	GLTP	Viridiplantae	Streptophyta	Dicots	Vitales	Vitaceae	Vitis	Vitis vinifera
RVX07685.1	Vitis vinifera	29760	GLTP	Viridiplantae	Streptophyta	Dicots	Vitales	Vitaceae	Vitis	Vitis vinifera
RVX07683.1	Vitis vinifera	29760	GLTP	Viridiplantae	Streptophyta	Dicots	Vitales	Vitaceae	Vitis	Vitis vinifera
RVX07678.1	Vitis vinifera	29760	GLTP	Viridiplantae	Streptophyta	Dicots	Vitales	Vitaceae	Vitis	Vitis vinifera
RVW98467.1	Vitis vinifera	29760	GLTP	Viridiplantae	Streptophyta	Dicots	Vitales	Vitaceae	Vitis	Vitis vinifera
RVW75931.1	Vitis vinifera	29760	GLTP	Viridiplantae	Streptophyta	Dicots	Vitales	Vitaceae	Vitis	Vitis vinifera
RVW75930.1	Vitis vinifera	29760	GLTP	Viridiplantae	Streptophyta	Dicots	Vitales	Vitaceae	Vitis	Vitis vinifera
RVW75921.1	Vitis vinifera	29760	GLTP	Viridiplantae	Streptophyta	Dicots	Vitales	Vitaceae	Vitis	Vitis vinifera
RVW75920.1	Vitis vinifera	29760	GLTP	Viridiplantae	Streptophyta	Dicots	Vitales	Vitaceae	Vitis	Vitis vinifera
RVW75919.1	Vitis vinifera	29760	GLTP	Viridiplantae	Streptophyta	Dicots	Vitales	Vitaceae	Vitis	Vitis vinifera
RVW75916.1	Vitis vinifera	29760	GLTP	Viridiplantae	Streptophyta	Dicots	Vitales	Vitaceae	Vitis	Vitis vinifera
RVW45778.1	Vitis vinifera	29760	GLTP	Viridiplantae	Streptophyta	Dicots	Vitales	Vitaceae	Vitis	Vitis vinifera
RVW45777.1	Vitis vinifera	29760	GLTP	Viridiplantae	Streptophyta	Dicots	Vitales	Vitaceae	Vitis	Vitis vinifera
RVW45776.1	Vitis vinifera	29760	GLTP	Viridiplantae	Streptophyta	Dicots	Vitales	Vitaceae	Vitis	Vitis vinifera
RVW39490.1	Vitis vinifera	29760	GLTP	Viridiplantae	Streptophyta	Dicots	Vitales	Vitaceae	Vitis	Vitis vinifera
RVW28167.1	Vitis vinifera	29760	GLTP	Viridiplantae	Streptophyta	Dicots	Vitales	Vitaceae	Vitis	Vitis vinifera
RVW23976.1	Vitis vinifera	29760	GLTP	Viridiplantae	Streptophyta	Dicots	Vitales	Vitaceae	Vitis	Vitis vinifera
CBI17899.3	Vitis vinifera	29760	GLTP	Viridiplantae	Streptophyta	Dicots	Vitales	Vitaceae	Vitis	Vitis vinifera
CBI17898.3	Vitis vinifera	29760	GLTP	Viridiplantae	Streptophyta	Dicots	Vitales	Vitaceae	Vitis	Vitis vinifera
CBI17897.3	Vitis vinifera	29760	GLTP	Viridiplantae	Streptophyta	Dicots	Vitales	Vitaceae	Vitis	Vitis vinifera
CBI17895.3	Vitis vinifera	29760	GLTP	Viridiplantae	Streptophyta	Dicots	Vitales	Vitaceae	Vitis	Vitis vinifera
CAN70263.1	Vitis vinifera	29760	GLTP	Viridiplantae	Streptophyta	Dicots	Vitales	Vitaceae	Vitis	Vitis vinifera
CAN63329.1	Vitis vinifera	29760	GLTP	Viridiplantae	Streptophyta	Dicots	Vitales	Vitaceae	Vitis	Vitis vinifera
AIU50587.1	Canna indica	4628	GLTP	Viridiplantae	Streptophyta	Monocots	Zingiberales	Cannaceae	Canna	Canna indica
AIU50565.1	Musa acuminata	4641	GLTP	Viridiplantae	Streptophyta	Monocots	Zingiberales	Musaceae	Musa	Musa acuminata
RZR72874.1	Ensete ventricosum	4639	GLTP	Viridiplantae	Streptophyta	Monocots	Zingiberales	Musaceae	Ensete	Ensete ventricosum
RWW53360.1	Ensete ventricosum	4639	GLTP	Viridiplantae	Streptophyta	Monocots	Zingiberales	Musaceae	Ensete	Ensete ventricosum
RWW17751.1	Ensete ventricosum	4639	GLTP	Viridiplantae	Streptophyta	Monocots	Zingiberales	Musaceae	Ensete	Ensete ventricosum
RRT70314.1	Ensete ventricosum	4639	GLTP	Viridiplantae	Streptophyta	Monocots	Zingiberales	Musaceae	Ensete	Ensete ventricosum
XP_009399044.1	Musa acuminata subsp. malaccensis	214687	GLTP	Viridiplantae	Streptophyta	Monocots	Zingiberales	Musaceae	Musa	Musa acuminata
THU65314.1	Musa balbisiana	52838	GLTP	Viridiplantae	Streptophyta	Monocots	Zingiberales	Musaceae	Musa	Musa balbisiana

## Sheet: Sheet2
Animalia
Viridiplantae
